# Supplementary material for: Triblock polyester thermoplastic elastomers with semi-aromatic polymer end blocks by ring-opening copolymerization
Source: PubMed Central journal article supplement — Chem Sci. 2020 May 4;11(25):6567–81. doi: 10.1039/d0sc00463d (PMC8159401; doi:10.1039/d0sc00463d), 2020-05-04
Supplement: SC-011-D0SC00463D-s001.pdf [file SC-011-D0SC00463D-s001.pdf]

## Supporting Information

# Triblock Polyester Thermoplastic Elastomers with Semi-aromatic Polymer End Blocks by Ring-Opening Copolymerization

Georgina L. Gregory,<sup>a</sup> Gregory S. Sulley,<sup>a</sup> Leticia Peña Carrodeguas,<sup>a</sup> Thomas T. D. Chen,<sup>a</sup> Alba Santmarti,<sup>b</sup> Nicholas J. Terrill,<sup>c</sup> Koon-Yang Lee<sup>b</sup> and Charlotte K. Williams<sup>\*a</sup>

<sup>a</sup> Chemistry Research Lab, University of Oxford, Mansfield Road, Oxford, UK, OX1 3TA

<sup>b</sup> Department of Engineering, Imperial College London, South Kensington, London, UK, SW7 2AZ

<sup>c</sup> Diamond Light Source, Harwell Science and Innovation Campus, Didcot, Harwell, UK, OX11 0DE

### Table of Contents

|                                                                                      |           |
|--------------------------------------------------------------------------------------|-----------|
| <b>1. Additional Experimental details</b> .....                                      | <b>2</b>  |
| <b>2. Instrumentation</b> .....                                                      | <b>2</b>  |
| <b>3. Catalyst Structure and Synthesis</b> .....                                     | <b>3</b>  |
| <b>4. Ring-Opening Copolymerization (ROCOP) Steps</b> .....                          | <b>4</b>  |
| <b>5. NMR Characterization</b> .....                                                 | <b>5</b>  |
| <b>6. Size-Exclusion Chromatography (SEC)</b> .....                                  | <b>6</b>  |
| <b>7. DOSY NMR Spectra</b> .....                                                     | <b>11</b> |
| <b>8. End-group Analysis by <sup>31</sup>P{<sup>1</sup>H} NMR Spectroscopy</b> ..... | <b>12</b> |
| <b>9. Polymer Purification</b> .....                                                 | <b>13</b> |
| <b>10. Additional Polymerization Data</b> .....                                      | <b>14</b> |
| <b>11. Glass Transition Temperature Data</b> .....                                   | <b>16</b> |
| <b>11.1. Differential Scanning Calorimetry (DSC)</b> .....                           | <b>17</b> |
| <b>11.2. Dynamic Mechanical Thermal Analysis (DMTA)</b> .....                        | <b>18</b> |
| <b>12. Mechanical Properties</b> .....                                               | <b>23</b> |
| <b>12.1. Uniaxial Extension Tensile Testing</b> .....                                | <b>23</b> |
| <b>12.2. Cyclic Tensile Testing</b> .....                                            | <b>28</b> |
| <b>13. Order-to-Disorder Transition</b> .....                                        | <b>32</b> |
| <b>14. Thermal Gravimetric Analysis (TGA)</b> .....                                  | <b>34</b> |
| <b>15. Small Angle X-ray Scattering (SAXS)</b> .....                                 | <b>37</b> |
| <b>16. Degradation Studies</b> .....                                                 | <b>40</b> |
| <b>17. Comparison to Literature TPEs.</b> .....                                      | <b>45</b> |
| <b>18. References</b> .....                                                          | <b>45</b> |

## 1. Additional Experimental details

**Phosphorus end group tests:** Following a literature procedure,<sup>[1]</sup> to polymer (40 mg) dissolved in CDCl<sub>3</sub> (0.4 mL) was added 40 μL of solution containing Cr(acac)<sub>3</sub> (5.5 mg) and internal standard, bisphenol A (400 mg) in pyridine (10 mL) followed by 40 μL of 2-chloro-4,4,5,5-tetramethyl dioxaphospholane.

**Degradation experiments:** Following the literature,<sup>[2]</sup> TBPE-5 (200 mg) was dissolved in toluene (10 mL) before adding *p*-TSA.H<sub>2</sub>O (10 mg, 0.05 mmol) and heating with stirring (500 rpm) to 60 °C in a Teflon capped vial. Progress was monitored by NMR and SEC analysis of aliquots taken at various time points. For degradation in distilled H<sub>2</sub>O, dumbbell specimens of known mass were placed in water with *p*-TSA.H<sub>2</sub>O. At set time points, a specimen was removed, dried under vacuum to constant mass and subject to tensile testing and SEC analysis. For enzymatic hydrolysis investigations at 37 °C, dumbbell specimens were suspended in phosphate buffer solution (pH 7.4) before adding Novozym<sup>®</sup> 51032 (4 wt%) and sodium azide (0.04 wt%) to prevent microbial growth.

## 2. Instrumentation

**NMR:** <sup>1</sup>H, <sup>31</sup>P {<sup>1</sup>H} and <sup>13</sup>C{<sup>1</sup>H} NMR were recorded on a Bruker Avance III HD 400 MHz spectrometer. DOSY spectra were recorded on Bruker Avance III HD 500 MHz spectrometer.

**Size Exclusion Chromatography (SEC):** Polymer (2-10 mg) dissolved in HPLC grade THF (1 mL) were syringe filtered through 2 μm filters before injection into Shimadzu LC-20AD SEC instrument with two PSS SDV 5 μm linear M columns heated to 30 °C. HPLC grade THF was used as the eluent at a flow rate 1.0 mL min<sup>-1</sup>. RI and UV detectors were calibrated using a series of narrow molecular weight polystyrene standards. Shimadzu SEC post run program was used to analyse the data.

**Differential Scanning Calorimetry (DSC):** Recorded for precipitated polymer samples on a Mettler Toledo DSC3 Star calorimeter under a N<sub>2</sub> flow (80 mL min<sup>-1</sup>). Samples were heated to 200 °C and held for 5 minutes, to remove thermal history, before heating and cooling from -80 to 200 °C at a rate of 10 °C min<sup>-1</sup>. Glass transition temperatures (*T<sub>g</sub>*) were determined from the midpoint of the transition in the second heating curve.

**Tensile Testing:** Dumbbell specimens were cut according to ISO 527-2, specimen type 5B with Zwick ZCP020 cutting press (length= 35 mm, gauge length = 10 mm, width = 2 mm). Monotonic uniaxial extension experiments were carried out on a Shimadzu EZ-LZ Universal testing instrument at an extension rate of 10 mm min<sup>-1</sup>. An external camera was used to calculate the Young's Modulus, *E* within the 0.025-0.25% strain region. 10 Specimens were tested for each material. Cyclic tensile tests were conducted to 200% or 1000% strain at a rate of 10 mm min<sup>-1</sup>. 10 Cycles were measured for each specimen, 3 specimens for each sample.

**Dynamic Mechanical Thermal Analysis (DMTA):** Recorded on TA instruments RSA-G2 Solids Analyser. Samples were heated with 1 Hz frequency between -60 and 220 °C at a rate of 5 °C min<sup>-1</sup>.

**Thermal Gravimetric Analysis (TGA):** Measured on Mettler-Toledo Ltd TGA/DSC 1 system. Powder polymer samples were heated from 30 to 500 °C at a rate of 5 °C min<sup>-1</sup>, under N<sub>2</sub> flow (100 mL min<sup>-1</sup>).

**Small-angle X-ray Scattering (SAXS):** Performed at beamLine station I-22, located at Diamond Light Source, Harwell, United Kingdom. Samples were mounted between two pieces of Kapton<sup>®</sup>. A monochromatic X-ray radiation ( $\lambda = 0.1$  nm) and 2D SAXS detector (Pilatus P3-2M, DECTRIS Ltd.) were used for the experiments. 2D scattering patterns were reduced to 1D using Dawn software developed at the Diamond Light Source.<sup>[3]</sup> All samples were annealed at 200 °C (above their upper  $T_g$ ) for 20 mins before being cooled and submitted for SAXS measurements.

### 3. Catalyst Structure and Synthesis

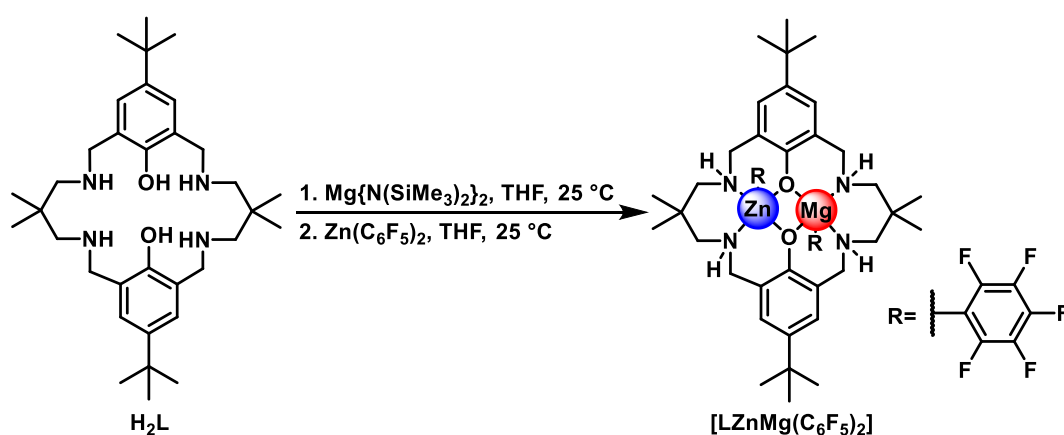

The catalyst was synthesised according to the published procedure.<sup>[4]</sup> In a N<sub>2</sub> filled glovebox,  $Mg\{N(SiMe_3)_2\}_2$  (0.31 g, 0.90 mmol, 1 equiv.) was added to a solution of  $H_2L$  (0.5 g, 0.90 mmol, 1 equiv.) in anhydrous THF (10 mL). The reaction was then left to stir for 1 h before a solution of  $Zn(C_6F_5)_2$  (0.36 g, 0.90 mmol, 1 equiv.) in THF (5 mL) was added. The solution was left to stir for 24 h. The precipitated catalyst was then isolated, washed with cold THF (5 mL) and pentane (2 × 5 mL) before being dried to yield a pale orange powder (0.62 g, 70%).

#### 4. Ring-Opening Copolymerization (ROCOP) Steps

##### Initiation

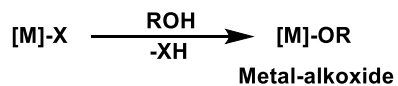

##### Propagation

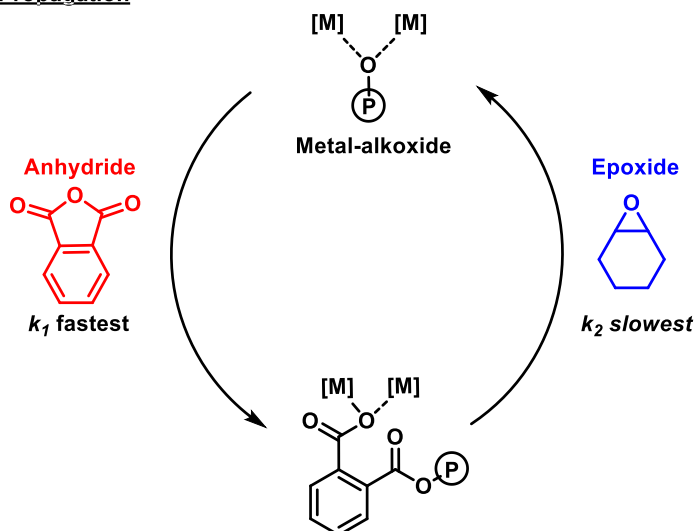

##### Chain Transfer Equilibra

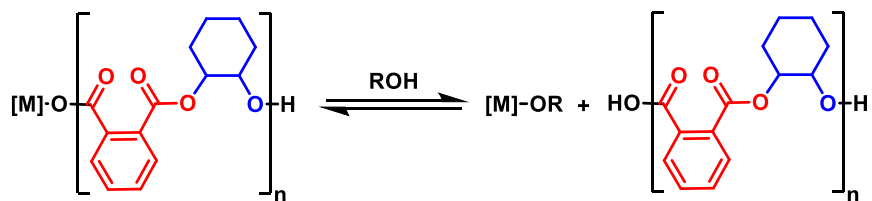

Where X =  $-\text{C}_6\text{F}_5$ , R = 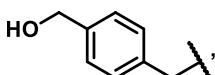, (P) = propagating chain

Fig. S1 Ring-opening copolymerization (ROCOP) steps.



## 5. NMR Characterization

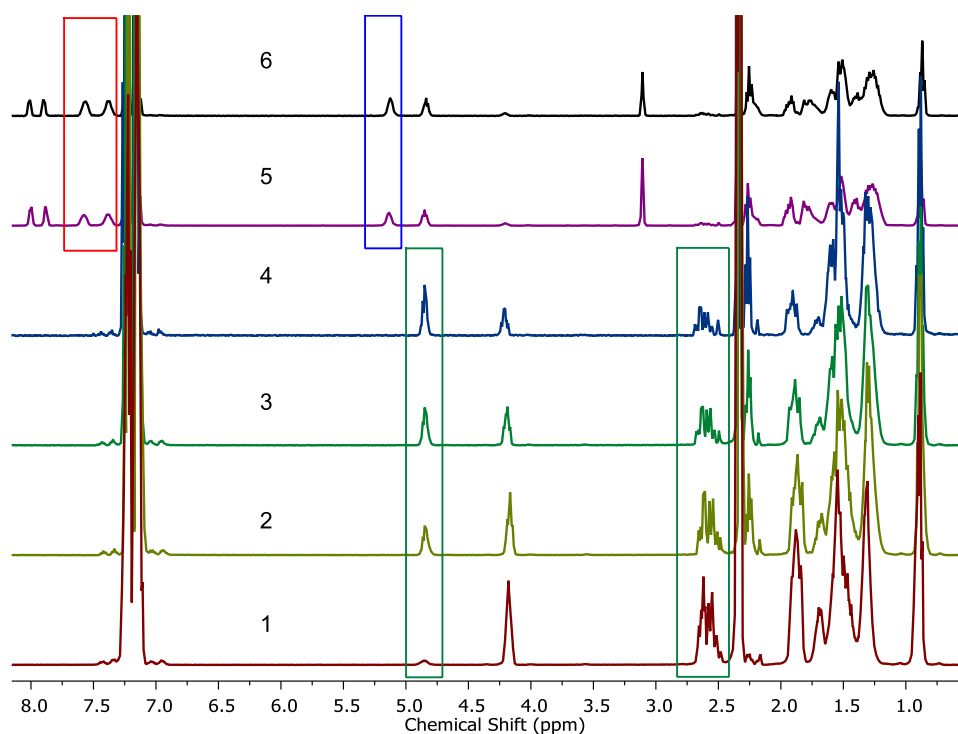

**Fig. S2** Stacked <sup>1</sup>H NMR spectra (CDCl<sub>3</sub>, 400 MHz) of selected aliquots taken during polymerisation of DL (1-4, green boxes highlight evolution of key PDL environments) and aliquots taken after the addition of PA and CHO mixture (5-6, blue and red boxes highlight CHO and PA environments in polyester (PE) used for conversion determination).

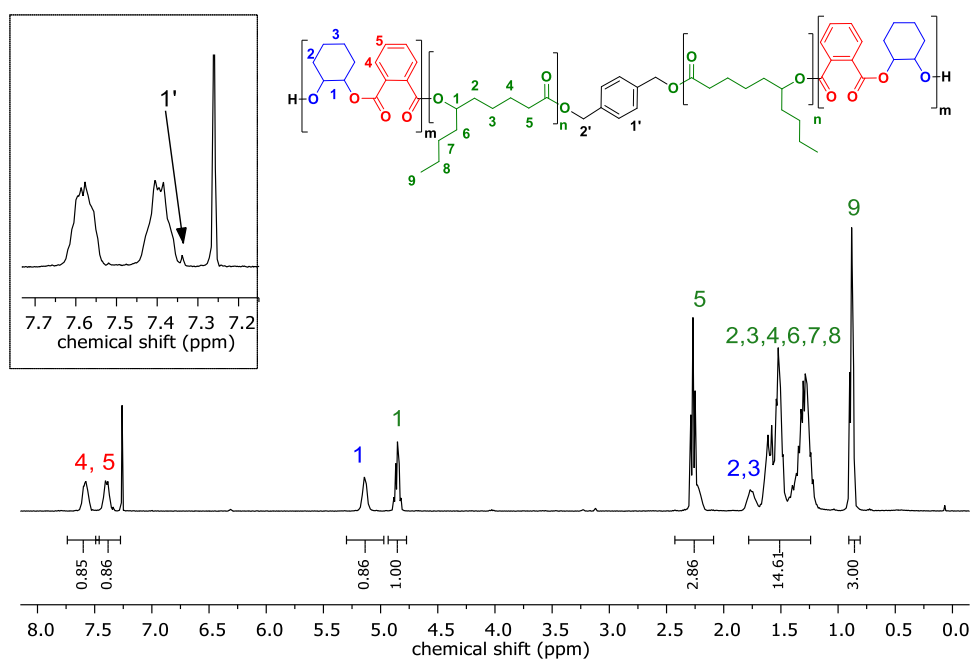

**Fig. S3** <sup>1</sup>H NMR spectrum (CDCl<sub>3</sub>, 400 MHz) of purified polymer TBPE-3.

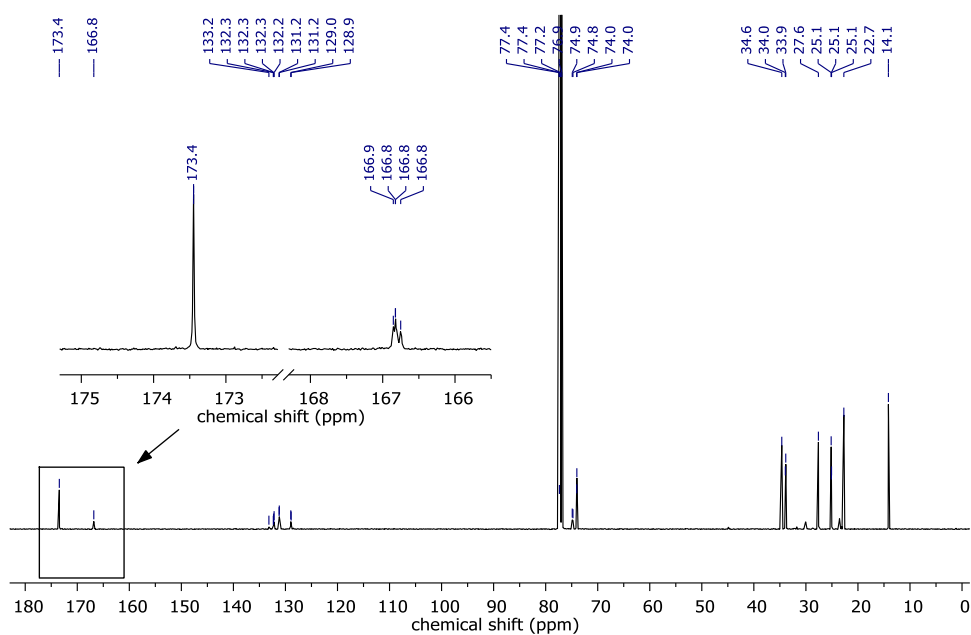

**Fig. S4**  $^{13}\text{C}\{^1\text{H}\}$  NMR spectrum ( $\text{CDCl}_3$ ) of TBPE-3; inset: carbonyl region showing C=O for PDL at 173.4 ppm and PE (166.8-166.9 ppm) and no evidence of transesterification.

## 6. Size-Exclusion Chromatography (SEC)

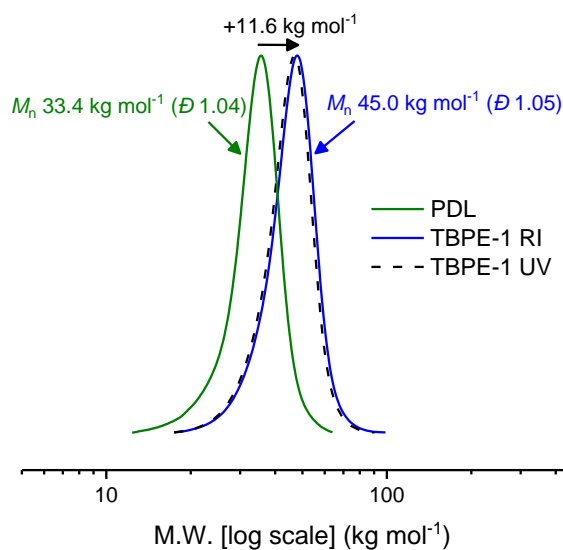

**Fig. S5** SEC traces for TBPE-1 (THF eluent, vs. PS standards) showing aliquot taken of reaction mixture before addition of PA/CHO (PDL, green) and of purified triblock copolymer (blue) with RI and UV detectors.

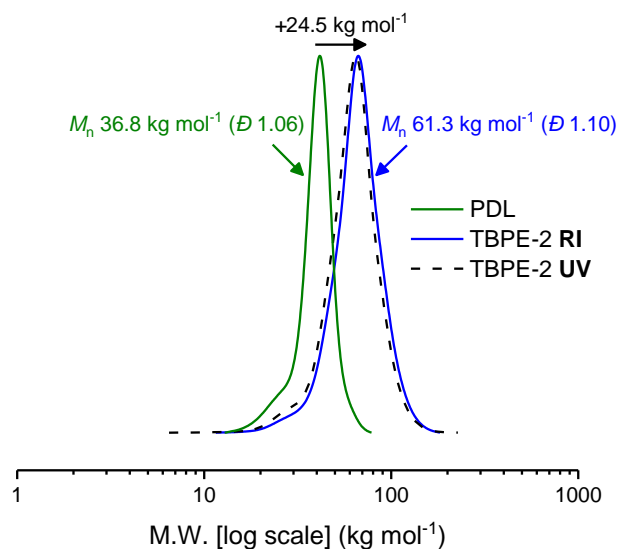

**Fig. S6** SEC traces for TBPE-2 (THF eluent, vs. PS standards) showing aliquot taken of reaction mixture before addition of PA/CHO (PDL, green) and of purified triblock copolymer (blue) with RI and UV detectors.

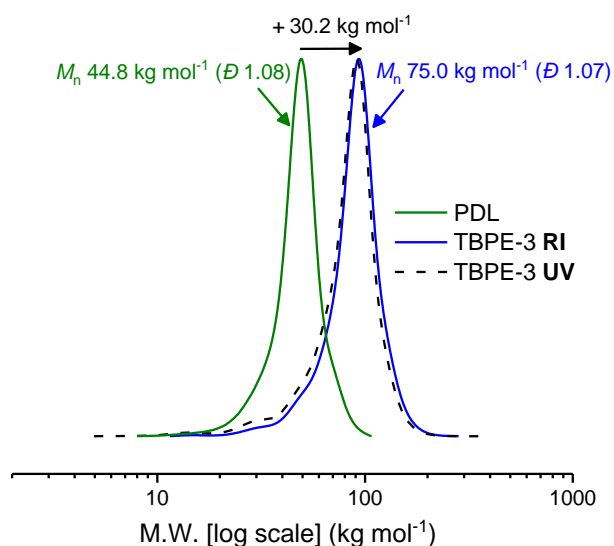

**Fig. S7** SEC traces for TBPE-3 (THF eluent, vs PS standards) showing aliquot taken of reaction mixture before addition of PA/CHO (PDL, green) and of purified triblock copolymer (blue) with RI and UV detectors.

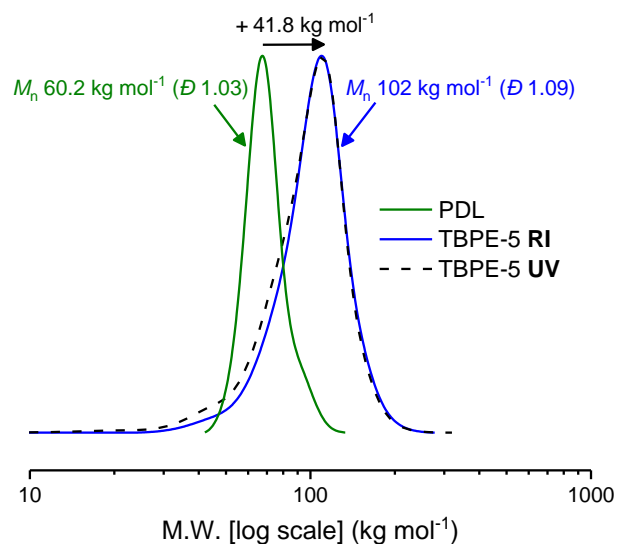

**Fig. S8** SEC traces for TBPE-5 (THF eluent, vs. PS standards) showing aliquot taken of reaction mixture before addition of PA/CHO (PDL, green) and of purified triblock copolymer (blue) with RI and UV detectors.

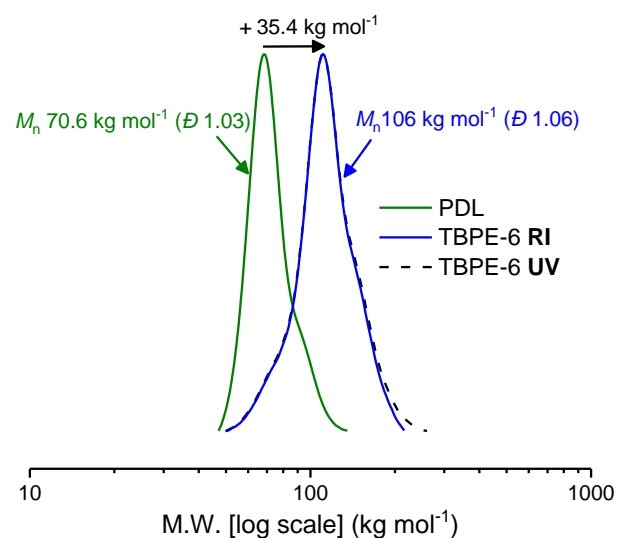

**Fig. S9.** SEC traces for TBPE-6 (THF eluent, vs. PS standards) showing aliquot taken of reaction mixture before addition of PA/CHO (PDL, green) and of purified triblock copolymer (blue) with RI and UV detectors.

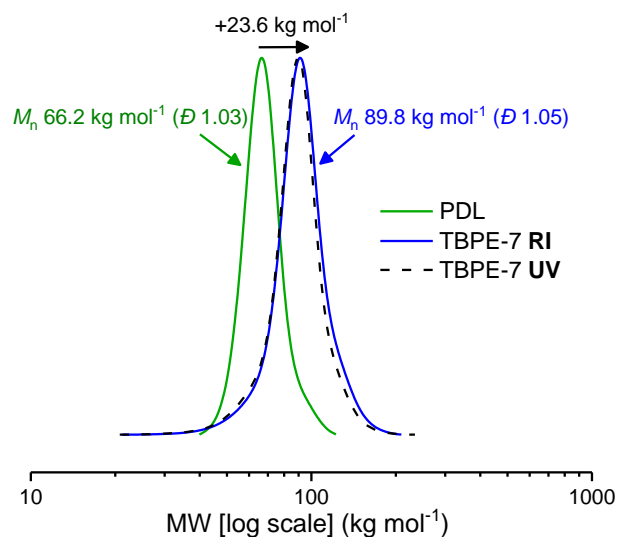

**Fig. S10** SEC traces for TBPE-7 (THF eluent, vs PS standards) showing aliquot taken of reaction mixture before addition of PA/CHO (PDL, green) and of purified triblock copolymer (blue) with RI and UV detectors.

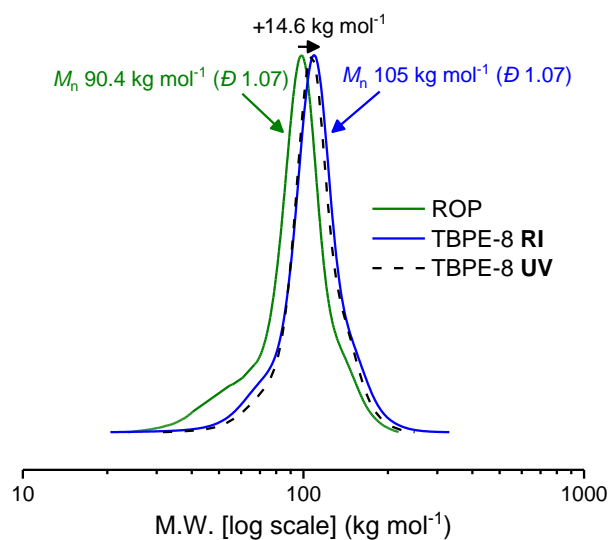

**Fig. S11** SEC traces for TBPE-8 (THF eluent, vs PS standards) showing aliquot taken of reaction mixture before addition of PA/CHO (PDL, green) and of purified triblock copolymer (blue) with RI and UV detectors.

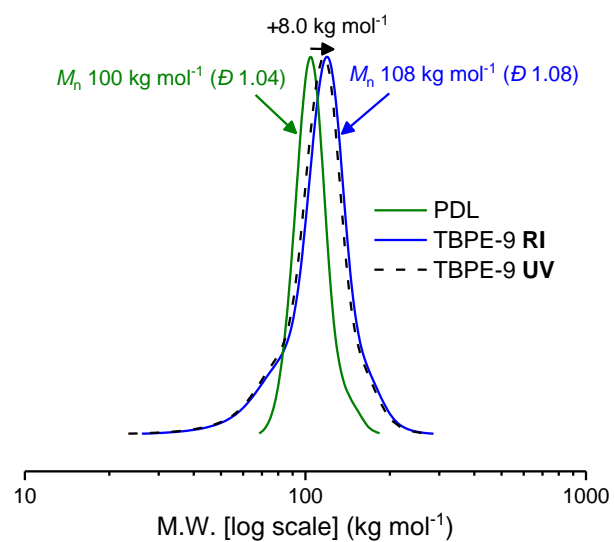

**Fig. S12** SEC traces for TBPE-9 (THF eluent, vs PS standards) showing aliquot taken of reaction mixture before addition of PA/CHO (PDL, green) and of purified triblock copolymer (blue) with RI and UV detectors.

## 7. DOSY NMR Spectra

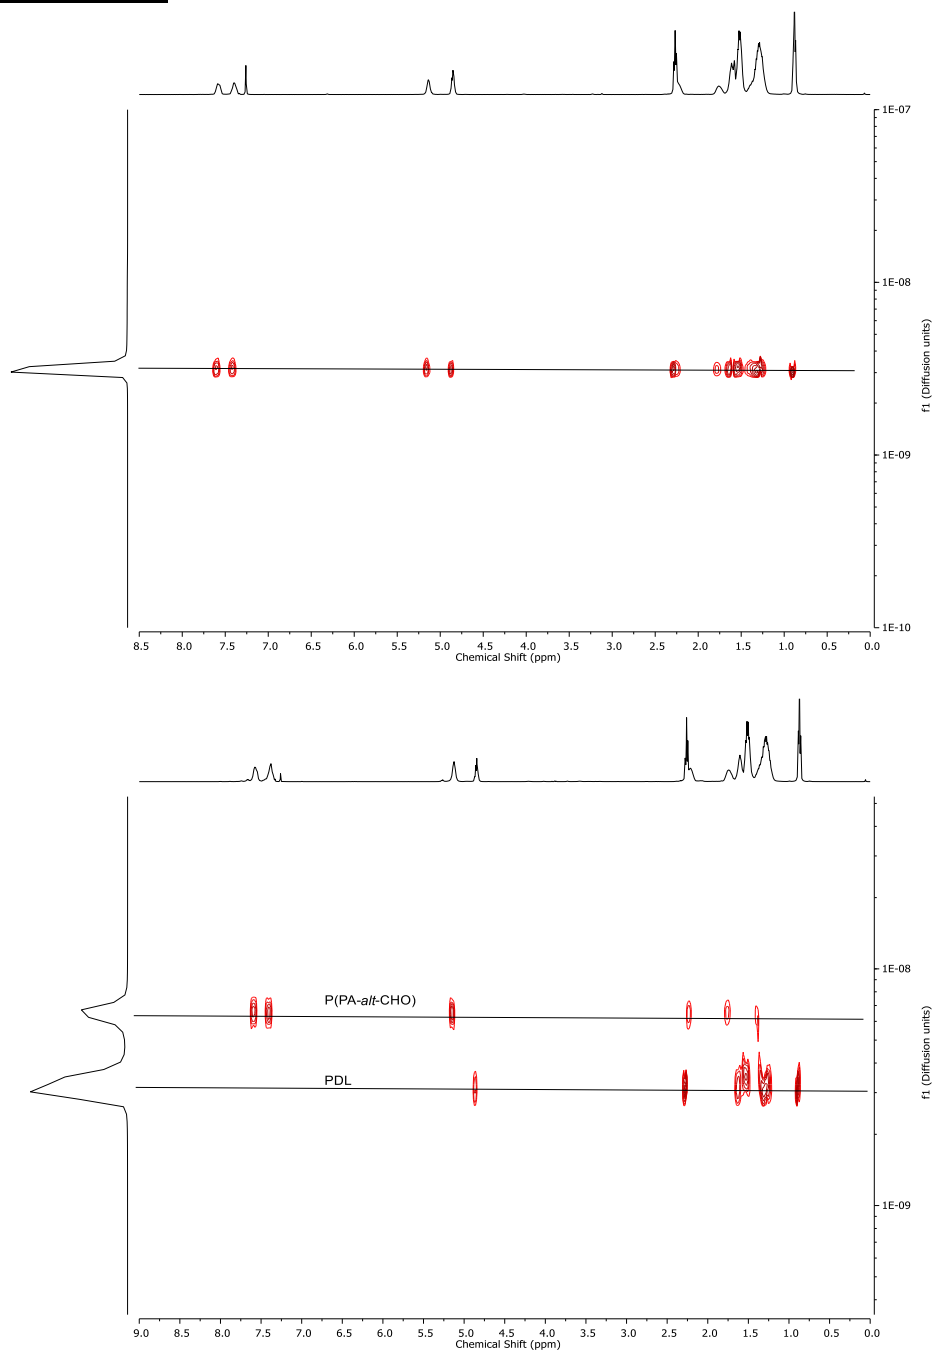

**Fig. S13** DOSY NMR spectra ( $\text{CDCl}_3$ ): **Top**; TBPE-3 ( $M_n$  75 kg mol $^{-1}$ ,  $D$  1.07,  $f_{\text{hard}}=0.41$ ) showing single diffusion coefficient consistent with triblock copolymer formation (*cf.* homopolymer blend). **Bottom**: 50:50 wt% blend of PDL and P(PA-*alt*-CHO) showing two diffusion coefficients.

## 8. End-group Analysis by $^{31}\text{P}\{^1\text{H}\}$ NMR Spectroscopy

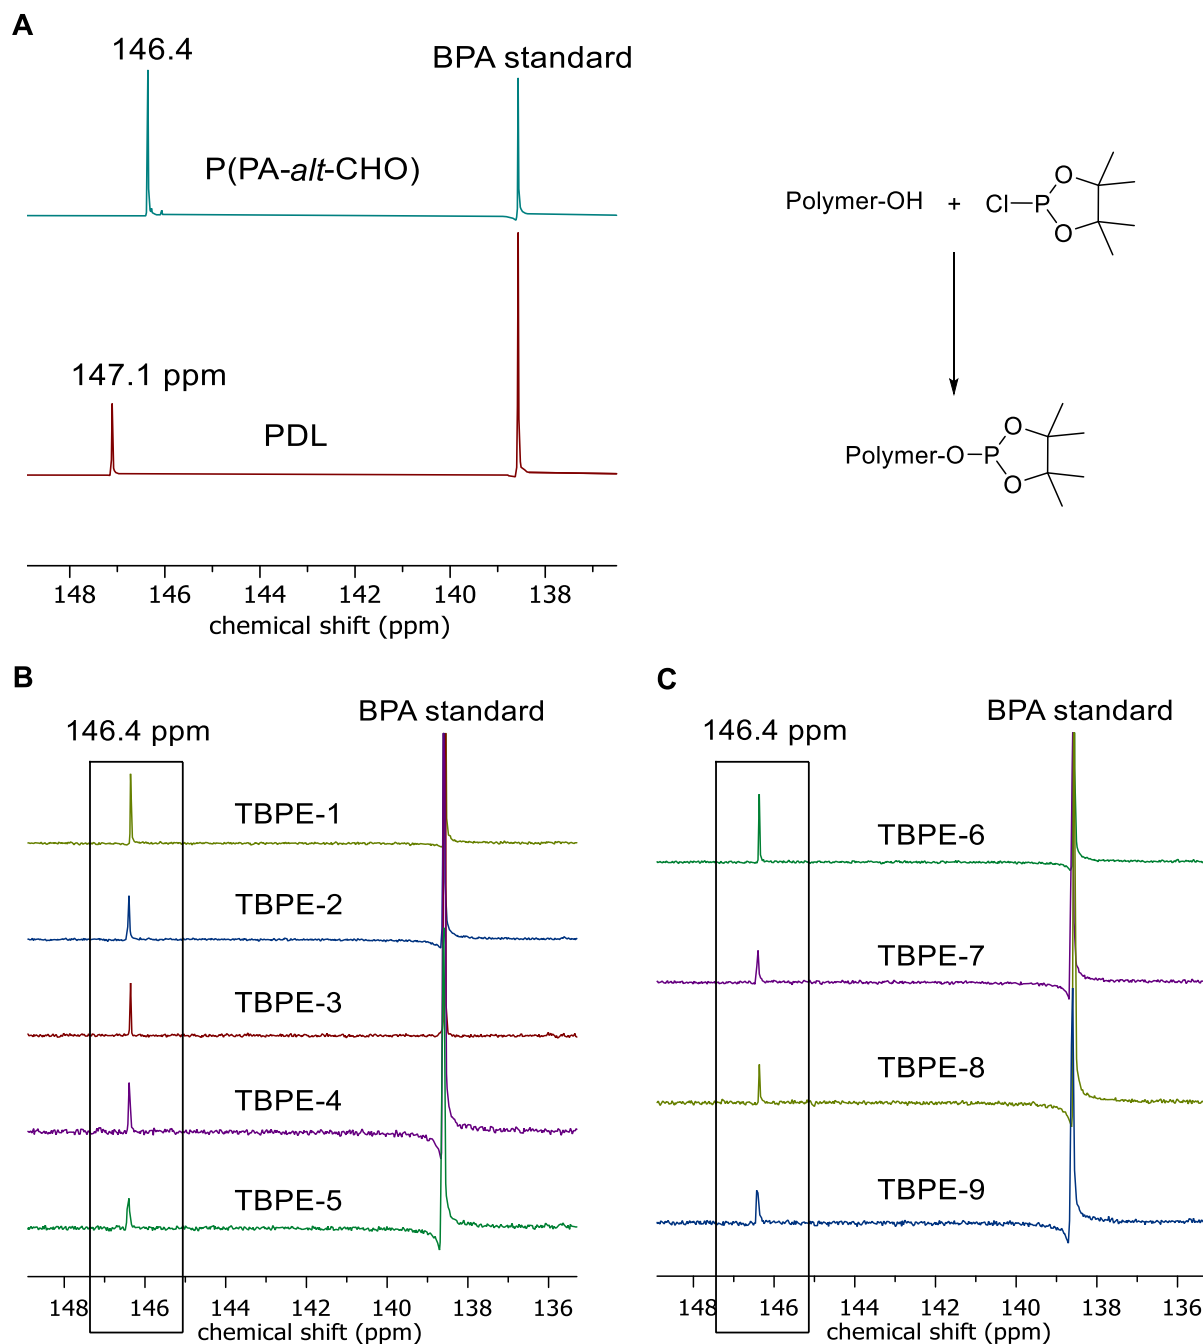

**Fig. S14**  $^{31}\text{P}\{^1\text{H}\}$  NMR spectra ( $\text{CDCl}_3$ ) after reaction of polymer hydroxyl end groups with 2-chloro-4,4,5,5-tetramethyldioxaphospholane (see experimental details above) showing **A**: PE and PDL polymers for reference, **B**:  $f_{\text{hard}} \sim 0.4$  series (TBPE-1 to -5) and **C**: series with  $M_n \sim 100 \text{ kg mol}^{-1}$  (TBPE-6 to -9). The peak at 138.6 ppm is used as the internal standard and corresponds to the product of the reaction between the phosphorous reagent and bis-phenol A (BPA).



## 9. Polymer Purification

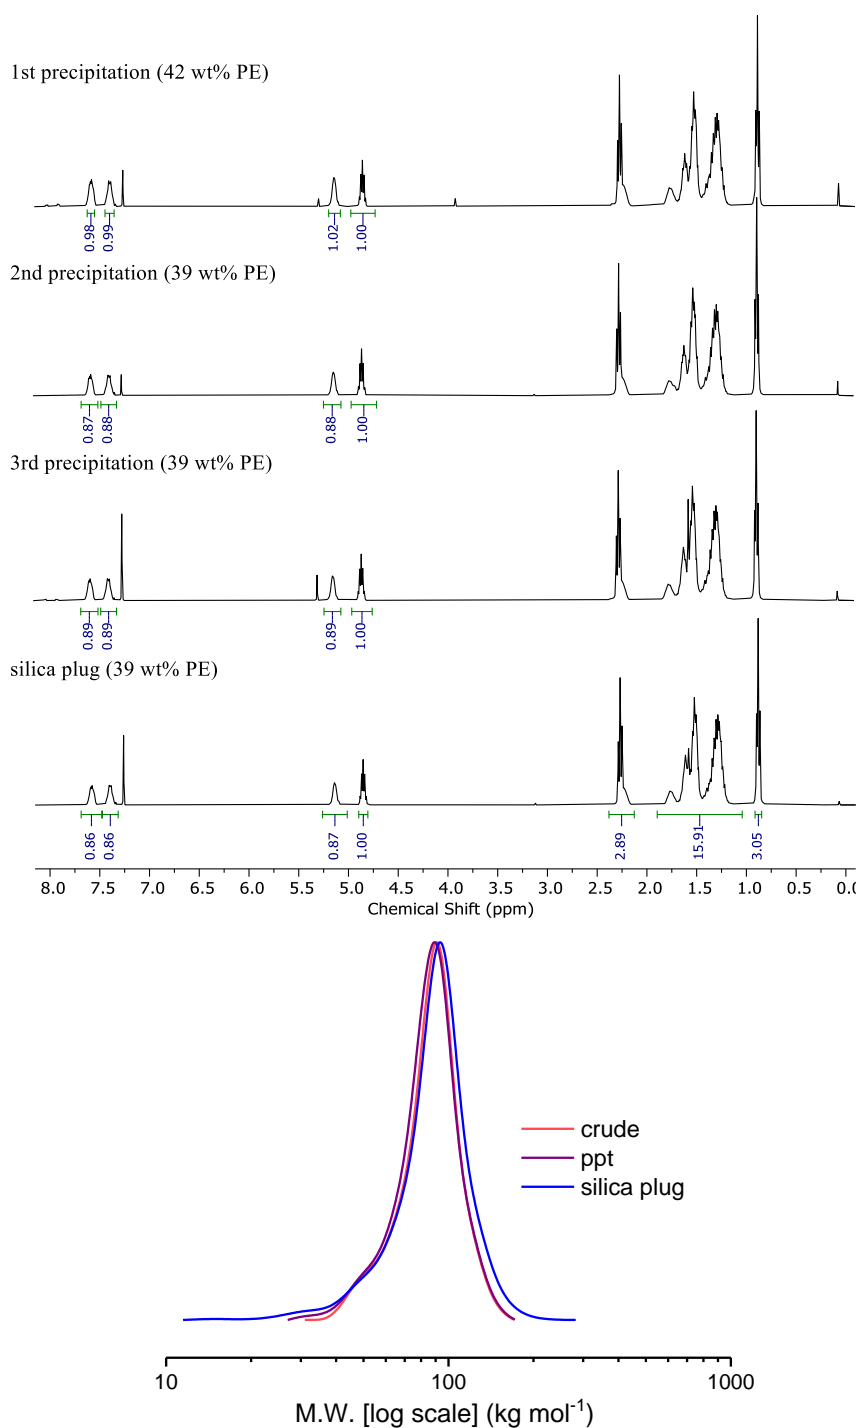

**Fig. S15** <sup>1</sup>H NMR spectra and SEC analysis of purified polymer TBPE-3 samples. Purification was by precipitation from MeOH and passing through a silica plug. **Top:** <sup>1</sup>H NMR spectra (CDCl<sub>3</sub>) after various purification steps. The wt% PE is determined by relative integration of the PDL methine signal (4.85 ppm, 1H) and CHO in PE (5.14 ppm, 2H). The reduction in wt% from 42 to 39 wt%, after the first precipitation, is attributed to errors within this wt% measurement method (typically NMR error range = ±5%). **Bottom:** TBPE-3 SEC traces (THF eluent, RI detector) of the crude reaction mixture, TBPE-3 after precipitation from methanol and the TBPE-3 film formed following purification by passing through a silica plug.

## 10. Additional Polymerization Data

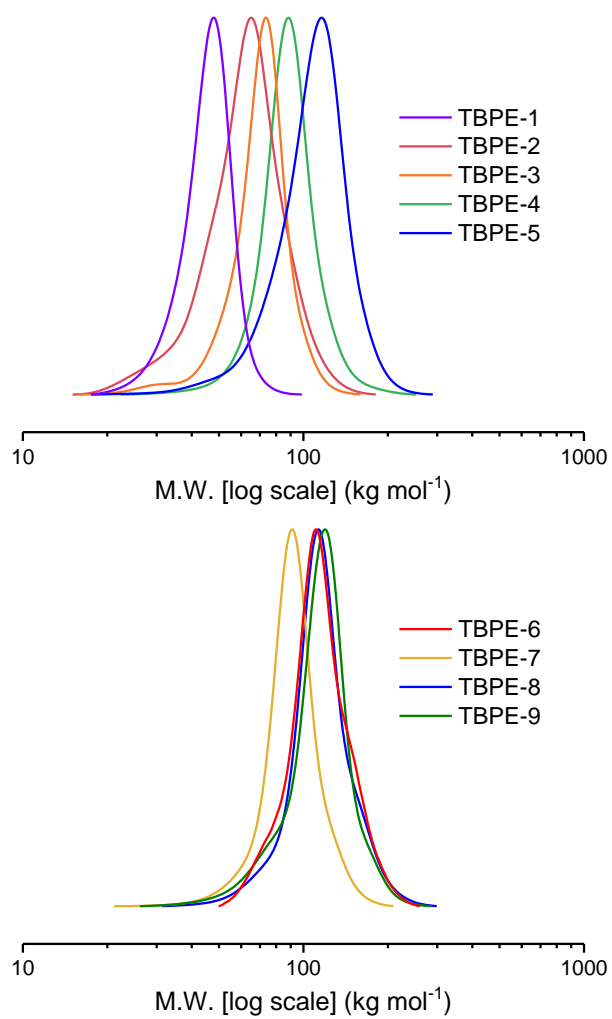

**Fig. S16** Stacked SEC traces of polymer films,  $f_{\text{hard}} \sim 0.4$  series (top) and  $M_n \sim 100 \text{ kg mol}^{-1}$  (bottom).

**Table S1.** Polymerisation Data for TBPEs.<sup>a</sup>

| Sample | PDL                    |                                     |                                                           |                                                              | PE- <i>b</i> -PDL- <i>b</i> -PE |                                                           |                                                          |                                                              |                     |
|--------|------------------------|-------------------------------------|-----------------------------------------------------------|--------------------------------------------------------------|---------------------------------|-----------------------------------------------------------|----------------------------------------------------------|--------------------------------------------------------------|---------------------|
|        | Conv. (%) <sup>b</sup> | [M] <sub>0</sub> / [I] <sub>0</sub> | M <sub>n, calc</sub> (kg mol <sup>-1</sup> ) <sup>c</sup> | M <sub>n, SEC</sub> (kg mol <sup>-1</sup> ) [Đ] <sup>d</sup> | Conv. PA (%) <sup>e</sup>       | M <sub>n, calc</sub> (kg mol <sup>-1</sup> ) <sup>f</sup> | M <sub>n, NMR</sub> (kg mol <sup>-1</sup> ) <sup>g</sup> | M <sub>n, SEC</sub> (kg mol <sup>-1</sup> ) [Đ] <sup>h</sup> | wt% PE <sup>i</sup> |
| TBPE-1 | 90                     | 200                                 | 32.7                                                      | 33.4 [1.04]                                                  | 96                              | 53.4                                                      | 43.7                                                     | 45.0 [1.05]                                                  | 38                  |
| TBPE-2 | 98                     | 200                                 | 33.4                                                      | 36.8 [1.06]                                                  | 98                              | 54.8                                                      | 59.2                                                     | 61.3 [1.10]                                                  | 42                  |
| TBPE-3 | 97                     | 250                                 | 41.3                                                      | 44.8 [1.08]                                                  | 87                              | 78.8                                                      | 73.5                                                     | 75.0 [1.07]                                                  | 39                  |
| TBPE-4 | 99                     | 250                                 | 42.1                                                      | 48.4 [1.08]                                                  | 99                              | 84.8                                                      | 80.3                                                     | 85.3 [1.06]                                                  | 42                  |
| TBPE-5 | 92                     | 400                                 | 62.7                                                      | 60.2 [1.03]                                                  | 85                              | 99.3                                                      | 95.4                                                     | 102 [1.09]                                                   | 38                  |
| TBPE-6 | 99                     | 400                                 | 67.4                                                      | 70.6 [1.03]                                                  | 87                              | 94.2                                                      | 95.0                                                     | 106 [1.06]                                                   | 27                  |
| TBPE-7 | 95                     | 400                                 | 64.7                                                      | 66.2 [1.03]                                                  | 89                              | 97.6                                                      | 88.3                                                     | 89.8 [1.05]                                                  | 23                  |
| TBPE-8 | 99                     | 600                                 | 97.0                                                      | 90.4 [1.07]                                                  | 99                              | 100.7                                                     | 113.5                                                    | 105 [1.07]                                                   | 18                  |
| TBPE-9 | 99                     | 600                                 | 97.0                                                      | 100.0 [1.04]                                                 | 99                              | 100.7                                                     | 102.0                                                    | 108 [1.08]                                                   | 11                  |

<sup>a</sup> Reaction conditions: 80 °C, [DL]<sub>0</sub> = 1.7 M in toluene; <sup>b</sup> Determined from the relative integrals in <sup>1</sup>H NMR spectra of methane resonances at 4.31 and 4.85 ppm for DL and PDL, respectively; <sup>c</sup> Based on initial [S]<sub>0</sub>/[BDM]<sub>0</sub> ratio and % conv. DL; <sup>d</sup> Estimated by SEC (THF eluent, RI detector vs. PS standards) of aliquot taken prior to addition of PA/CHO; <sup>e</sup> Conversion PA to PE determined from the relative integrals of resonances for PA (8.15 ppm) compared to PE (7.71 ppm) from the <sup>1</sup>H NMR spectrum, no ether linkages; <sup>f</sup> Based on initial [PA+CHO]<sub>0</sub>/[BDM]<sub>0</sub> ratio and % conv. PA; <sup>g</sup> Estimated from the relative integrals of PE (7.51 ppm) and PDL (4.79 ppm) resonances in the <sup>1</sup>H NMR spectra of the purified polymer films; <sup>h</sup> Estimated by SEC of purified polymer films (RI and UV detector, THF eluent vs PS standards. <sup>i</sup> Determined from the relative integrals of PE (7.51 ppm) and PDL (4.79 ppm) resonances in the <sup>1</sup>H NMR spectra of purified polymer films and using molar masses of PDL and PE repeat units of 170.3 and 246.3 g mol<sup>-1</sup>, respectively.

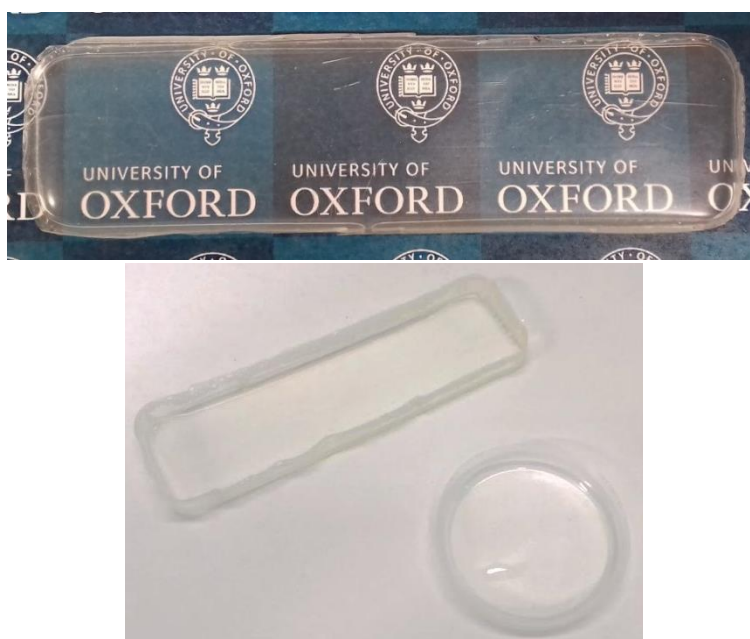**Fig. S17** Transparent colourless films of TBPEs.

Calculation of the volume fraction of the hard (PE) domain ( $f_{hard}$ ):

$$f_{hard} = \frac{\rho_{hard}}{\rho_{PDL} \left( \frac{1}{\omega_{hard}} - 1 \right) + \rho_{hard}} \quad (1)$$

Where  $\omega_{hard}$  is the wt% of hard block determined from the integrals in the  $^1H$  NMR spectrum (see Table S1) and  $\rho_{PDL}$ ,  $\rho_{PE}$  are the densities of PDL and PE at room temperature, respectively.

Degree of polymerisation relative to a standard reference volume ( $N$ ):

$$N_{PDL} = \frac{M_{PDL}}{\rho_{PDL}(T)N_A v_{ref}}; N_{total} = N_{PDL} + N_{hard} \quad (2)$$

Where  $N_{PDL}$ ,  $N_{hard}$  and  $N_{total}$  are the degrees of polymerisation relative to a standard reference volume ( $v_{ref}=118 \text{ \AA}$ ) for PDL, the PE hard domain and overall, respectively.  $N_A$  is Avogadro's number.

## 11. Glass Transition Temperature Data

Table S2. Summary of TBPE thermal properties measured by DSC and DMTA.

| Sample | DP<br>PE-PDL-<br>PE <sup>a</sup> | DSC <sup>b</sup>    |                                         |                    |                                        | DMTA <sup>e</sup>    |                     |                   | OTW <sup>f</sup> |
|--------|----------------------------------|---------------------|-----------------------------------------|--------------------|----------------------------------------|----------------------|---------------------|-------------------|------------------|
|        |                                  | $T_{g,PDL}$<br>(°C) | $T_{g,PDL}^{calc}$<br>(°C) <sup>c</sup> | $T_{g,PE}$<br>(°C) | $T_{g,PE}^{calc}$<br>(°C) <sup>d</sup> | $T_{g, PDL}$<br>(°C) | $T_{g, PE}$<br>(°C) | $T_{ODT}$<br>(°C) |                  |
| PE     | 41                               | -                   |                                         | 130                |                                        | -                    | -                   | n.a.              |                  |
| PE     | 20                               | -                   |                                         | 122                |                                        | -                    | -                   | n.a.              |                  |
| PDL    | 352                              | -51                 |                                         | -                  |                                        | -                    | -                   | n.a.              |                  |
| TBPE-1 | 35-164-35                        | -49                 | -52                                     | 105                | 111                                    | nd                   | 124                 | 158               | 173              |
| TBPE-2 | 52-209-52                        | -50                 | -51                                     | 122                | 123                                    | nd                   | 142                 | 175               | 192              |
| TBPE-3 | 59-269-59                        | -50                 | -51                                     | 123                | 126                                    | nd                   | 143                 | 183               | 193              |
| TBPE-4 | 73-292-73                        | -50                 | -51                                     | 126                | 130                                    | nd                   | 145                 | 187               | 195              |
| TBPE-5 | 79-371-79                        | -51                 | -51                                     | 138                | 131                                    | nd                   | 155                 | 193               | 206              |
| TBPE-6 | 58-455-58                        | -51                 | -51                                     | nd                 | 125                                    | -42                  | 146                 | n.o.              | 188              |
| TBPE-7 | 42-406-42                        | -51                 | -51                                     | nd                 | 117                                    | -41                  | 136                 | n.o.              | 177              |
| TBPE-8 | 38-506-38                        | -51                 | -51                                     | nd                 | 114                                    | -44                  | 132                 | n.o.              | 176              |
| TBPE-9 | 24-565-24                        | -51                 | -51                                     | nd                 | 95                                     | -44                  | 123                 | n.o.              | 167              |

<sup>a</sup> Degree of polymerization (DP) determined from overall  $M_n$  estimated by SEC and wt% hard domain from  $^1H$  NMR spectra integrals as described in Table 1 and S1; <sup>b</sup> $T_g$  values estimated by DSC, heating rate  $10 \text{ }^\circ\text{C min}^{-1}$ , second heating curve; <sup>c</sup> Determined using the Flory-Fox equation:  $T_g = T_g^\infty - \frac{K}{M_n}$ , using parameters reported by Hillmyer and coworkers ( $K = 3400 \pm 2200$ ,  $T_g^\infty = 51.4 \pm 0.3^\circ\text{C}$ ).<sup>[6]</sup> <sup>d</sup> Flory-Fox parameters ( $T_g^\infty = 147 \pm 10 \text{ }^\circ\text{C}$  and  $K = 305 \pm 74 \text{ kg mol}^{-1}$ ) estimated based on  $T_g$  values measured in this work and those reported for the  $M_n$  range 4.0 to 34.6  $\text{kg mol}^{-1}$  (a total of 20 data points) with  $T_g \sim 57$  to  $146 \text{ }^\circ\text{C}$ .<sup>[7]</sup> All data was recorded at  $10 \text{ }^\circ\text{C min}^{-1}$  from the second cycle, samples show  $< 1 \%$  ether linkages. NB. It remains a challenge within the field to achieve high  $M_n$  PE limiting the accuracy of these parameters. <sup>e</sup> Measured from the peak in  $\tan(\delta)$ , 1 Hz frequency,  $5 \text{ }^\circ\text{C min}^{-1}$  heating rate, 0.1 N pre-load, 0.1 % stain for entries TBPE-1 to 5, 1% strain for TBPE-6 to-9. The glass transition temperatures determined by DSC are systematically about  $20 \text{ }^\circ\text{C}$  lower for PE compared to those measured by DMTA. This is a well reported observation and attributed to different heating rates, frequency and means of measuring the  $T_g$  value from the data (i.e midpoint of glass transition from DSC and peak in  $\tan(\delta)$  by DMTA).<sup>[8]</sup> n.d.=not determined, n.o.=not observed, n.a.= not applicable. <sup>f</sup> Theoretical operating temperature window (OTW) based on upper and lower glass transition temperatures determined by DSC for TBPE-1 to -5 and DMTA for -6 to -9.

### 11.1. Differential Scanning Calorimetry (DSC)

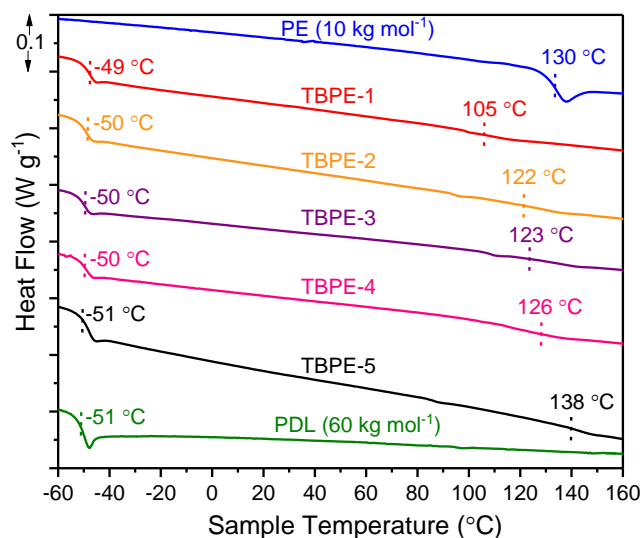

**Fig. S18** DSC traces (second heating curve) of purified TBPE-1 to -5 and pure PDL and PE heated at a rate of  $10\text{ °C min}^{-1}$  from  $-80$  to  $200\text{ °C}$ .

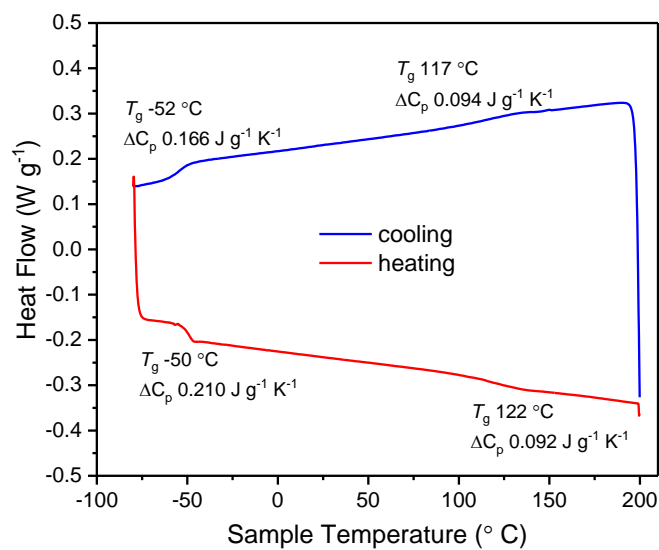

**Fig. S19** DSC second heating and cooling for TBPE-2. Heating rate,  $10\text{ °C min}^{-1}$ ,  $-80$  to  $200\text{ °C}$ ,  $\text{N}_2$  flow.

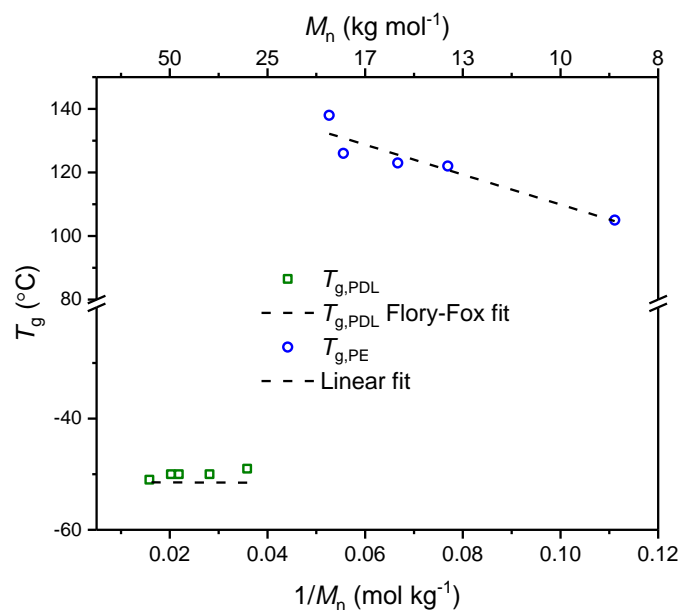

**Fig. S20** Dependence of glass transition temperature ( $T_g$ ) on molar mass for PDL ( $\square$ ) and PE ( $\circ$ ) domains for TBPE-1 to -5. Temperatures were measured by DSC (at a heating rate of  $10\text{ }^\circ\text{C min}^{-1}$ ) from the midpoint of the glass transition in the second heating curve. Dashed line is Flory-Fox fit for PDL homopolymer  $T_g = T_g^\infty - \frac{K}{M_n}$  where  $T_g^\infty = 51.4 \pm 0.3\text{ }^\circ\text{C}$  and  $K = 3400 \pm 2200\text{ kg mol}^{-1}$ .<sup>[6]</sup>

## 11.2. Dynamic Mechanical Thermal Analysis (DMTA)

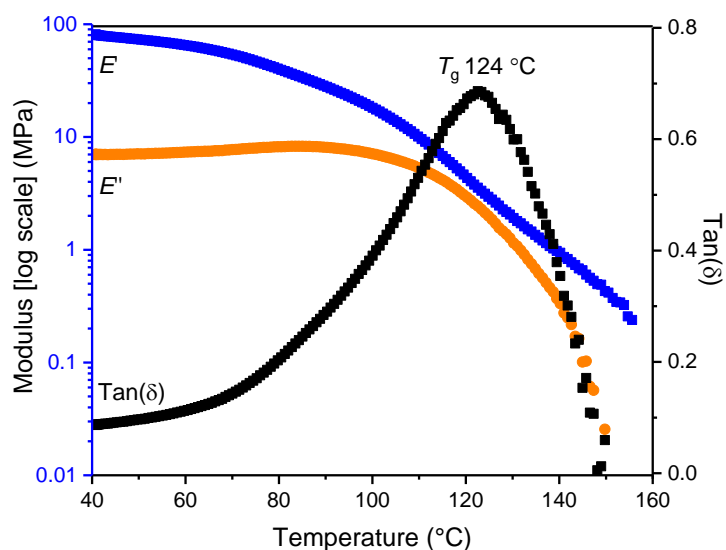

**Fig. S21** DMTA of TBPE-1 (1 Hz frequency, heating rate  $5\text{ }^\circ\text{C min}^{-1}$ , 1% amplitude strain, 0.1 N pre-load).

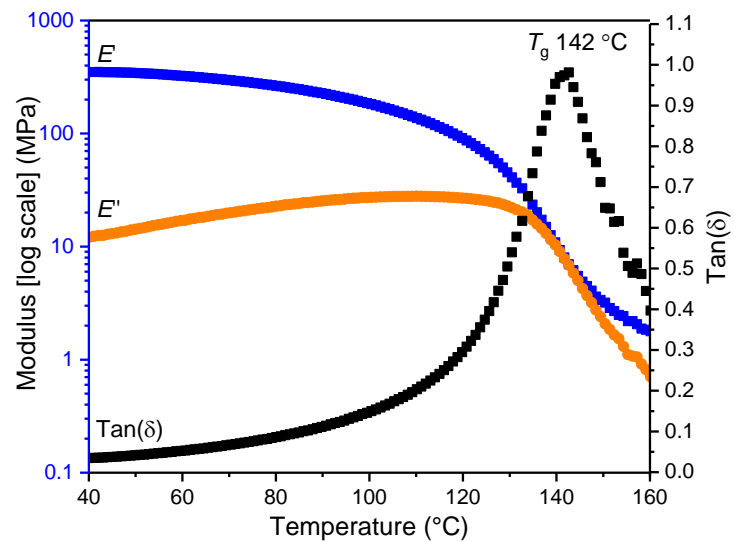

**Fig. S22** DMTA of TBPE-2 (1 Hz frequency, heating rate 5 °C min<sup>-1</sup>, 0.1% amplitude strain, 0.1 N pre-load).

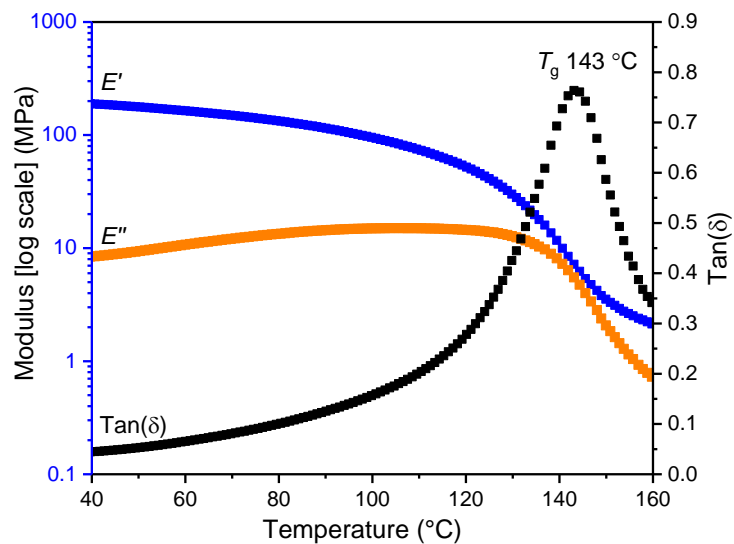

**Fig. S23** DMTA of TBPE-3 (1 Hz frequency, heating rate 5 °C min<sup>-1</sup>, 1% amplitude strain, 0.1 N pre-load).

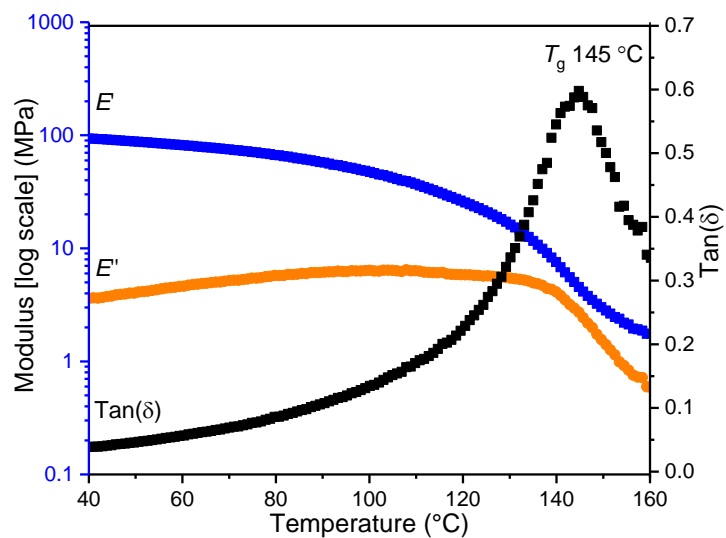

**Fig. S24** DMTA of TBPE-4 (1 Hz frequency, heating rate 5 °C min<sup>-1</sup>, 0.1% amplitude strain, 0.1 N pre-load).

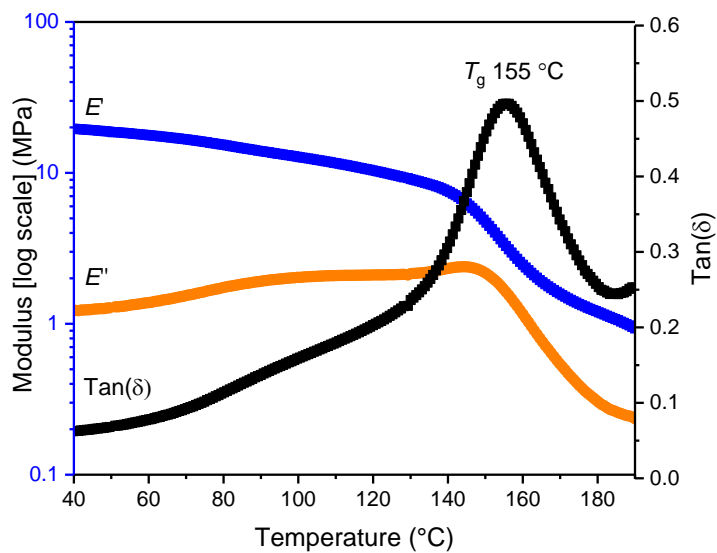

**Fig. S25** DMTA of TBPE-5 (1 Hz frequency, heating rate 5 °C min<sup>-1</sup>, 1% amplitude strain, 0.1 N pre-load).



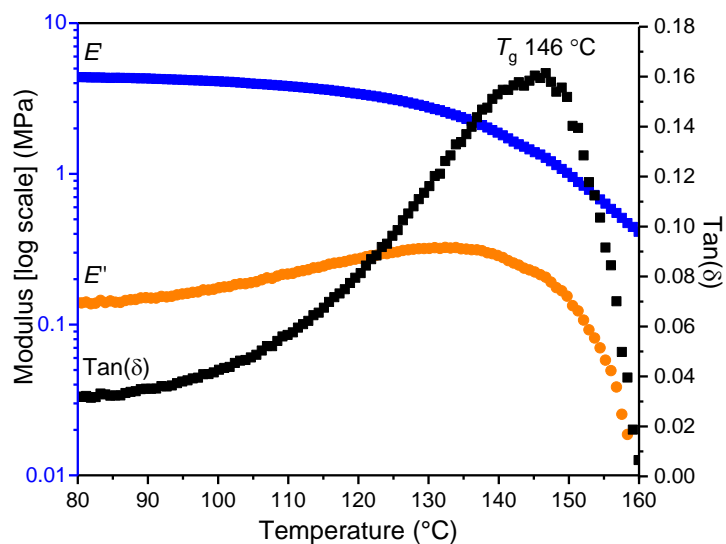

**Fig. S26** DMTA of TBPE-6 (1 Hz frequency, heating rate 5 °C min<sup>-1</sup>, 0.1% amplitude strain, 0.1 N pre-load).

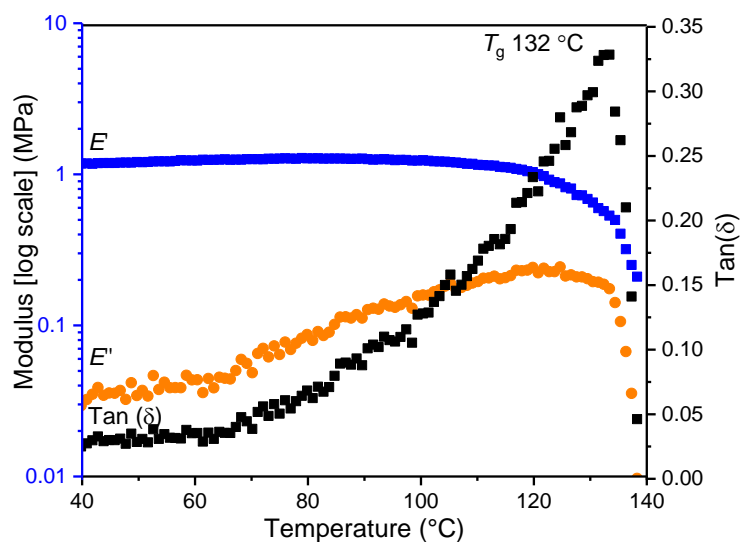

**Fig. S27** DMTA of TBPE-8 (1 Hz frequency, heating rate 5 °C min<sup>-1</sup>, 0.1% amplitude strain, 0.1 N pre-load).

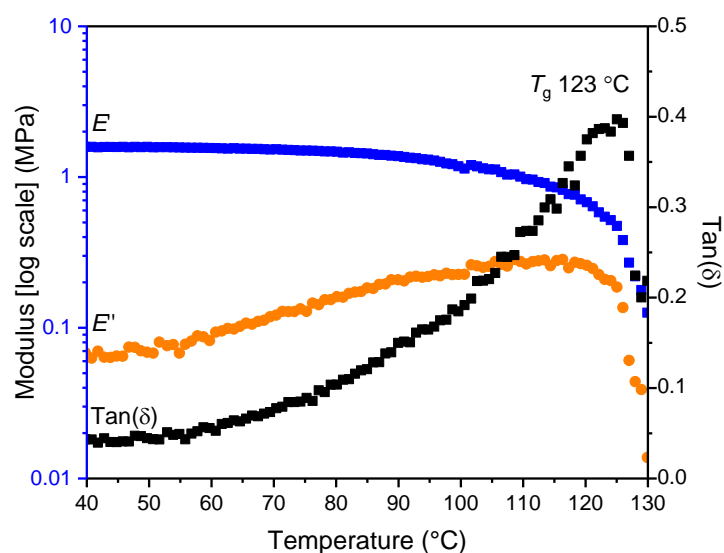

**Fig. S28** DMTA of TBPE-9 (1 Hz frequency, heating rate 5 °C min<sup>-1</sup>, 0.1% amplitude strain, 0.1 N pre-load).

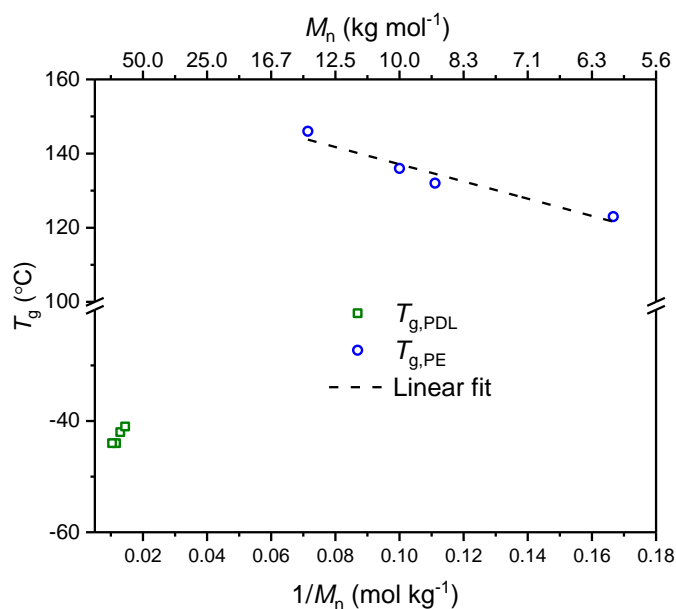

**Fig. S29** Dependence of glass transition temperature ( $T_g$ ) on molar mass of PE (o) and PDL (□) domains for TBPE-6 to -9.  $T_g$  values determined by DMTA from peak maxima in  $\tan(\delta)$ .

**Table S3.** Calculation of  $M_e$  for TPBE-6 to -9 and comparison to literature values.

| Triblock Copolymer <sup>a</sup> | $G'$ (MPa) <sup>b</sup> | $M_e^{\text{PDL}}$ (kg mol <sup>-1</sup> ) <sup>c</sup> | $M_e^{\text{PDL}}$ (kg mol <sup>-1</sup> ) | Reference |
|---------------------------------|-------------------------|---------------------------------------------------------|--------------------------------------------|-----------|
| TBPE-6 (106, 0.29)              | 2.3                     | 1.1                                                     | 2.9                                        | This work |
| TBPE-7 (90, 0.24)               | 1.1                     | 2.3                                                     | 5.5                                        | This work |
| TBPE-8 (105, 0.19)              | 0.5                     | 5.3                                                     | 9.0                                        | This work |
| TBPE-9 (108, 0.12)              | 0.4                     | 5.7                                                     | 9.1                                        | This work |
| PLA-PDL-PLA (136, 0.27)         |                         | 5.3                                                     |                                            | [6]       |
| PLA-PDL-PLA (148, 0.21)         |                         | 6.7                                                     |                                            | [6]       |
| PLLA-PDL-PLLA (162, 0.063)      | 0.63                    |                                                         | 4.6                                        | [9]       |
| PLLA-PDL-PLLA (173, 0.13)       | 0.97                    |                                                         | 3.9                                        | [9]       |

|                           |      |  |     |     |
|---------------------------|------|--|-----|-----|
| PLLA-PDL-PLLA (191, 0.24) | 1.24 |  | 4.8 | [9] |
| PLA-PDL-PLA (140, * 0.25) | 0.83 |  | 7.2 | [9] |

<sup>a</sup> Name of polymer (total  $M_n$  by SEC,  $f_{hard}$ ), <sup>\*</sup> Theoretical  $M_n$  from monomer-to-initiator loading; <sup>b</sup> Shear storage modulus which is related to the storage modulus  $E'$  by:  $E' = 2G'(1+\nu)$ , assuming a Poisson's ratio ( $\nu$ ) of 0.5, typical of elastomers. <sup>c</sup> Molecular weight between entanglements ( $M_e$ ) Calculated from the following relationship:  $M_e^{PDL} = \frac{\rho RT}{G'}$  where  $\rho$  is the density of PDL. <sup>d</sup> Calculated using the Guth-Smallwood equation:  $M_e^{PDL} = \rho RT / G(1 + 2.5f_{hard} + 14.1f_{hard}^2)$ , which assumes spherical hard domains acting as rigid fillers.<sup>[10]</sup>

## 12. Mechanical Properties

### 12.1. Uniaxial Extension Tensile Testing

Length = 35 mm, gauge length = 10 mm, width = 2 mm.

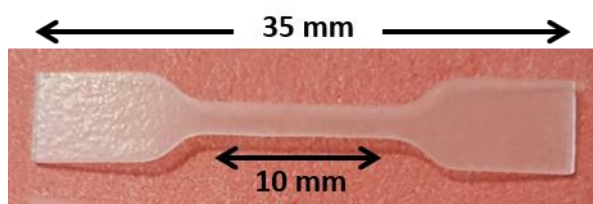

**Table S4.** Mechanical properties for TBPE-1 to -5 containing ca. 40 wt% PE. Comparison to commercial styrenic block copolymers has been made alongside literature examples with PDL midblock.<sup>a</sup>

| Sample | $\sigma_y$ (MPa) <sup>c</sup> | $\epsilon_y$ (%) <sup>c</sup> | $E_y$ (MPa) <sup>d</sup> | $E'$ (MPa) <sup>e</sup> | $\sigma_b$ (MPa) <sup>f</sup> | $\epsilon_b$ (%) <sup>f</sup> |
|--------|-------------------------------|-------------------------------|--------------------------|-------------------------|-------------------------------|-------------------------------|
| TBPE-1 | 2.7 ± 0.2                     | 4.6 ± 0.8                     | 48 ± 6                   | 54                      | 13.3 ± 4.2                    | 1110 ± 92                     |
| TBPE-2 | 4.5 ± 0.3                     | 4.0 ± 0.7                     | 226 ± 8                  | 283                     | 29.1 ± 4.4                    | 1079 ± 128                    |
| TBPE-3 | 3.1 ± 1.0                     | 3.7 ± 1.2                     | 165 ± 21                 | 194                     | 16.6 ± 0.9                    | 1060 ± 49                     |
| TBPE-4 | 2.9 ± 1.2                     | 8.4 ± 3.3                     | 68 ± 7                   | 96                      | 12.5 ± 1.2                    | 1362 ± 121                    |
| TBPE-5 | 1.6 ± 0.7                     | 12.1 ± 3.8                    | 18 ± 3                   | 20                      | 16.5 ± 1.0                    | 1342 ± 43                     |

<sup>a</sup> Unless otherwise noted, mechanical properties were measured by uniaxial tensile testing experiments of solvent cast films at extension rate of 10 mm min<sup>-1</sup>; reported values are a mean of 10 specimens, error is standard deviation. Stress is measured as  $\sigma = F/A_0$  where  $F$  = load,  $A_0$  original cross-sectional area of specimen (engineering stress) and strain  $\epsilon = \Delta l/l_0$ ;  $l_0$  original length of specimen (engineering strain). <sup>b</sup> Determined from overall  $M_n$  by SEC and wt% PE; <sup>c</sup> Stress and strain at the yield point. <sup>d</sup> Young's Modulus measured as ratio of stress to strain in linearly elastic region following Hooke's Law  $\sigma = E\epsilon$ ; determined by external camera in 0.025-0.25% elongation region; measure of stiffness of material; <sup>e</sup> Storage modulus ( $E'$ ) measured by DMTA for comparison with Young's Modulus ( $E$ ).  $E$  is systematically lower than  $E'$  which is attributed to solvent cast vs. thermally pressed samples and error in determining  $E$  from stress-strain curve. <sup>f</sup> Maximum stress before break/fracture of material and percent elongation to break (ultimate elongation).

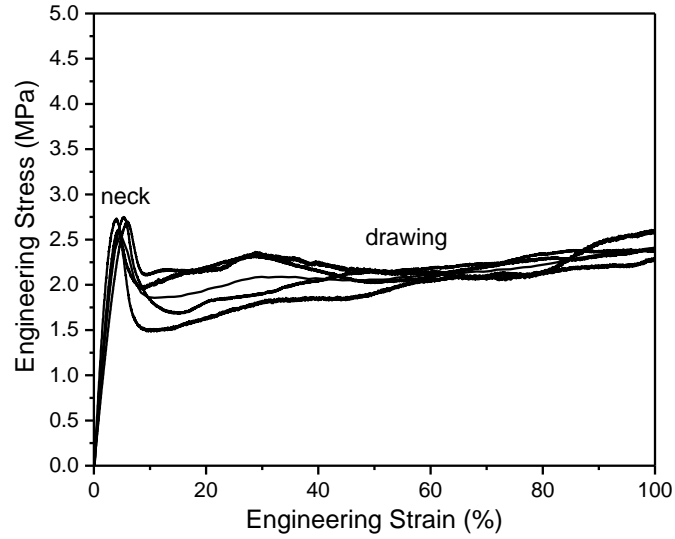

**Fig. S30** Stress-Strain curves for TBPE-1 ( $10 \text{ mm min}^{-1}$  extension rate).

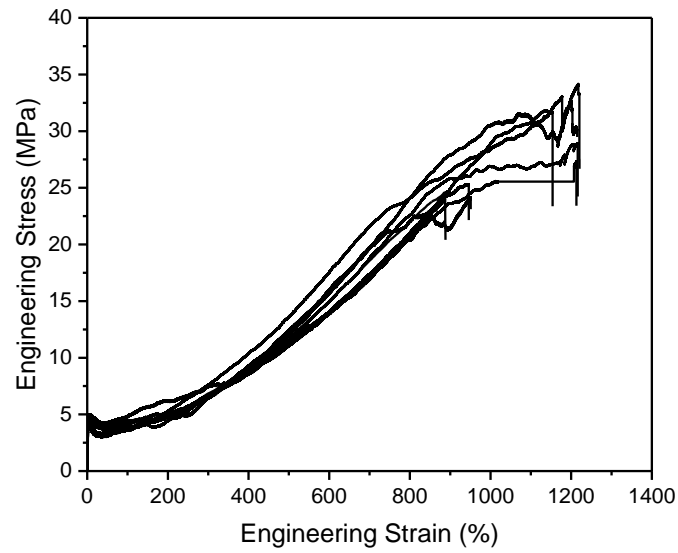

**Fig. S31** Stress-Strain curves for TBPE-2 ( $10 \text{ mm min}^{-1}$  extension rate).

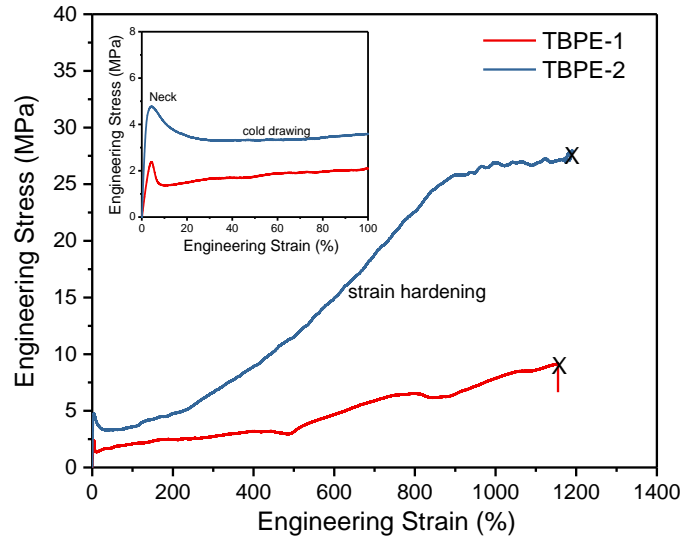

**Fig. S32** Representative stress-strain curves for TBPE-1 and TBPE-2 for direct comparison. Inset: 0-100% strain region showing neck and cold drawing.

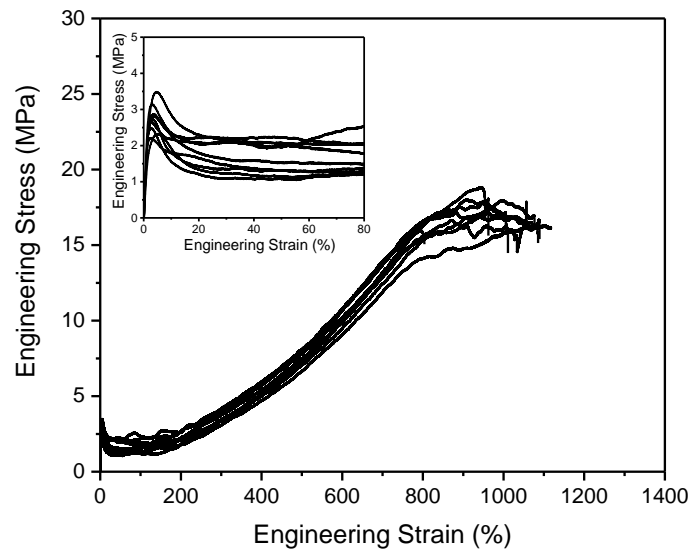

**Fig. S33** Stress-Stress curves for TBPE-3 ( $10 \text{ mm min}^{-1}$  extension rate). Inset; 0-80% elongation region showing yield point.

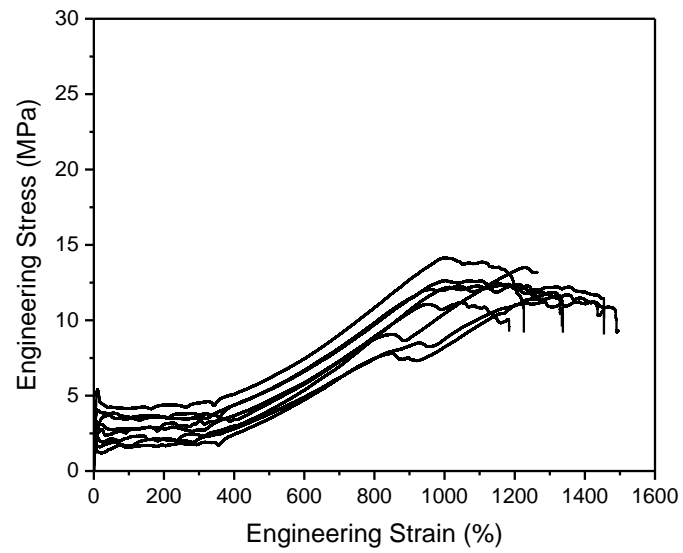

**Fig. S34** Stress-Stress curves for TBPE-4 ( $10 \text{ mm min}^{-1}$  extension rate).

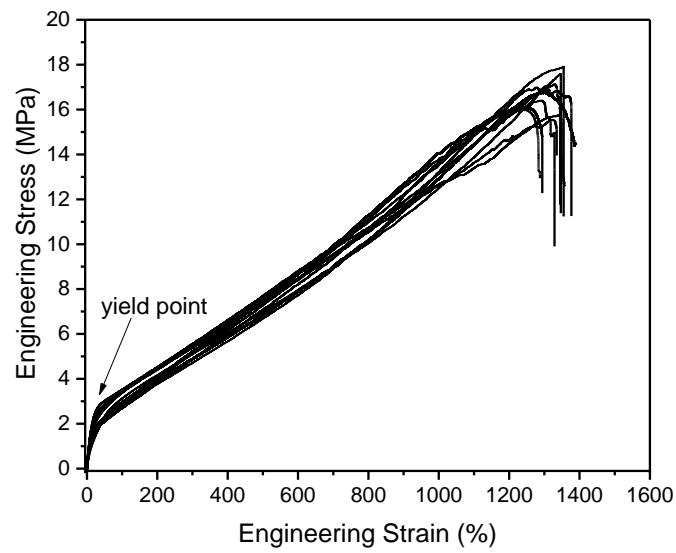

**Fig. S35** Stress-Stress curves for TBPE-5 ( $10 \text{ mm min}^{-1}$  extension rate).

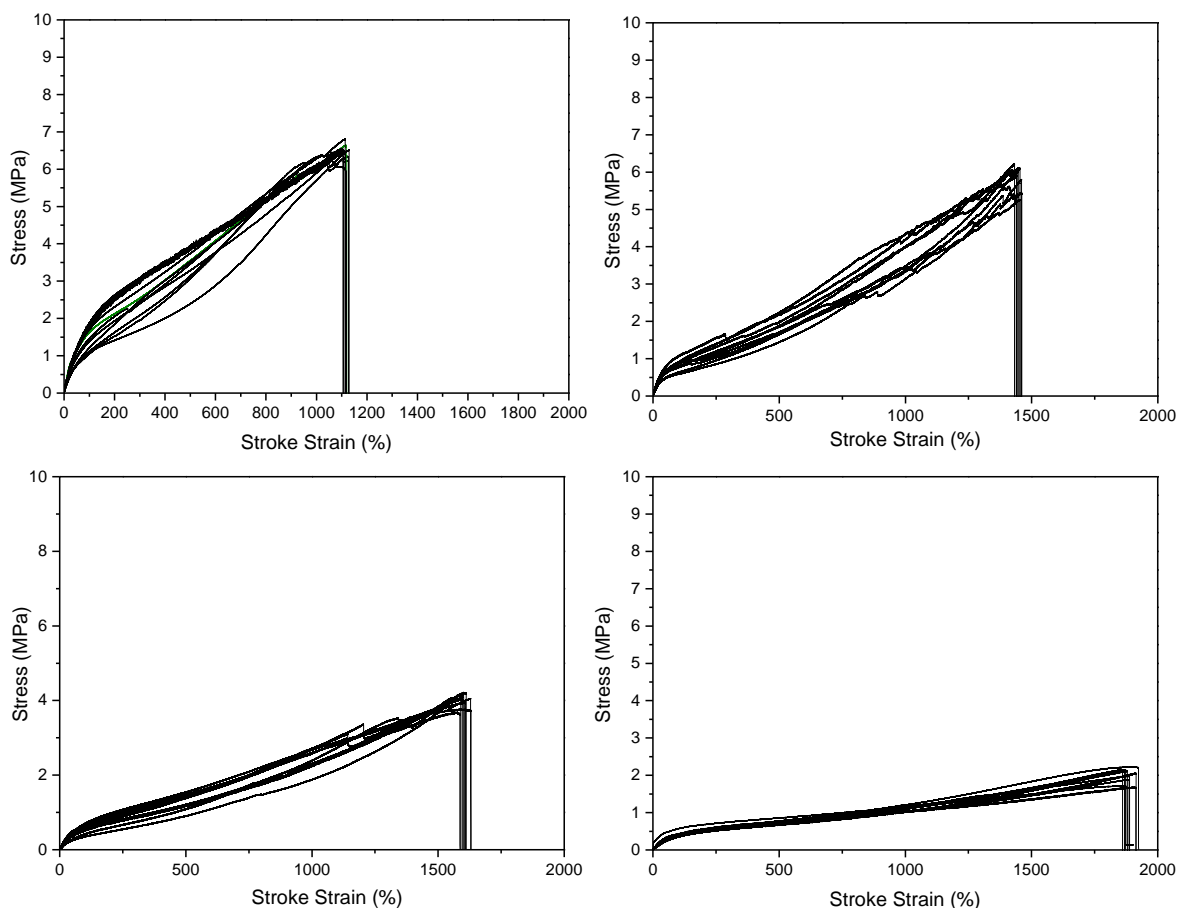

**Fig. S36** Stress strain curves TBPEs-6 to -9 (extension rate  $10 \text{ mm min}^{-1}$ ). **Top-left to right:** TBPE-6 and TBPE-7; **Bottom-left to right:** TBPE-8 and TBPE-9.

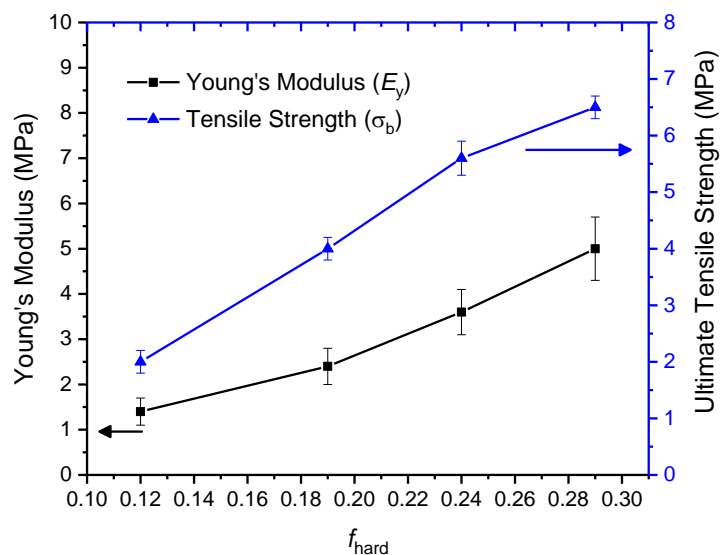

**Fig. S37** Young's Modulus and ultimate tensile strength as a function of volume fraction of hard block for TBPE-6 to 9. Error bars represent the standard deviation of measurements carried out on 10 specimens cut from solvent cast films.

## 12.2. Cyclic Tensile Testing

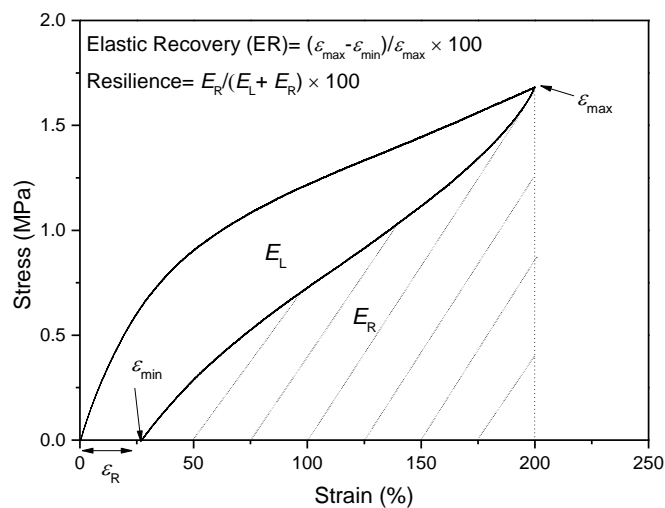

**Fig. S38** Schematic of parameters measured during cyclic tensile test. Calculation of elastic recovery and resilience where  $E_L$  is energy loss,  $E_R$  energy recovery,  $\epsilon_{max}$  (maximum strain),  $\epsilon_{min}$  (minimum strain),  $\epsilon_R$  residual strain. Reproduced from C. Tang and coworkers.<sup>[11]</sup>

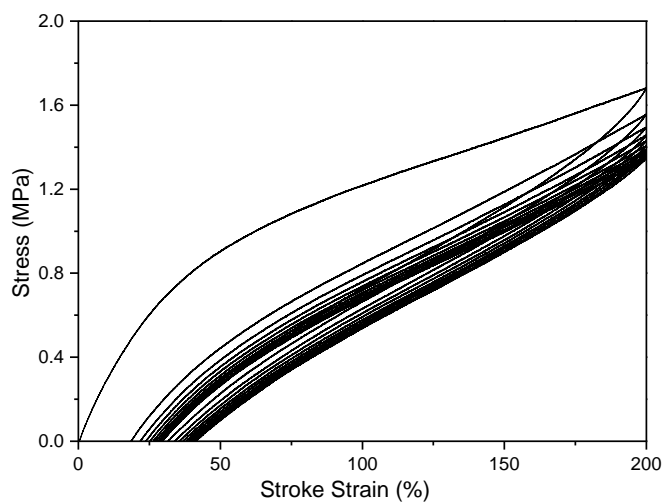

**Fig. S39** Stress-Strain curve for a cyclic tensile test of TBPE-6 sample tested for 10 cycles to a maximum strain of 200% strain at a rate of  $10 \text{ mm min}^{-1}$ .



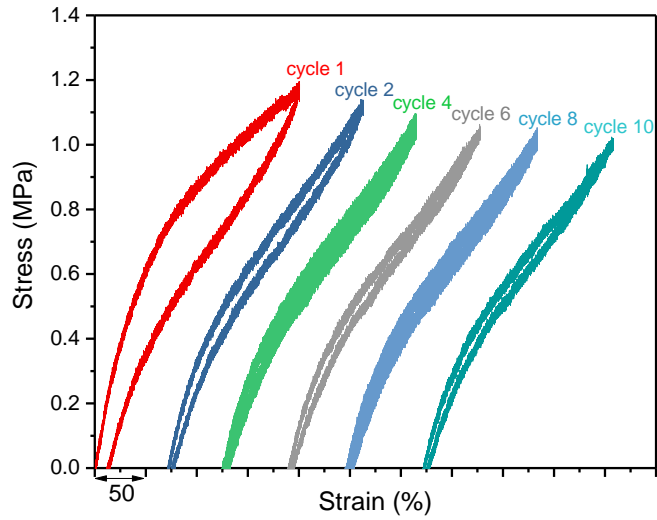

**Fig. S40** Cyclic tensile test for TBPE-7 to 200 % strain ( $10 \text{ mm min}^{-1}$ ) showing alternate cycles, horizontally shifted for clarity.

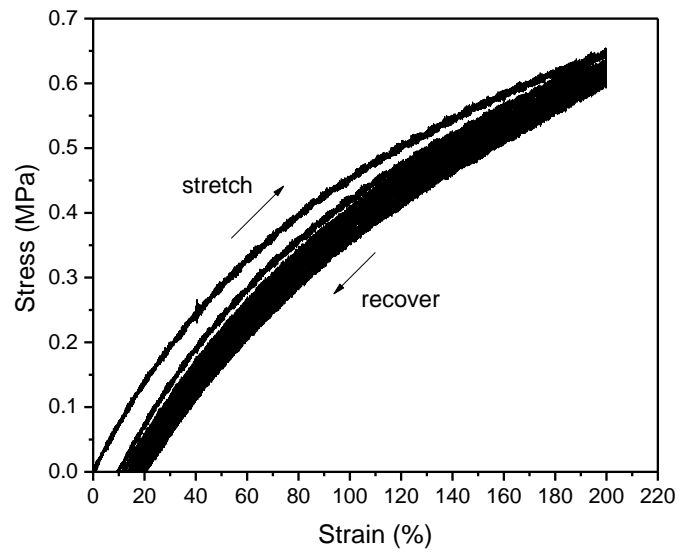

**Fig. S41** Cyclic tensile test for TBPE-8 (200% stain,  $10 \text{ mm min}^{-1}$ ).

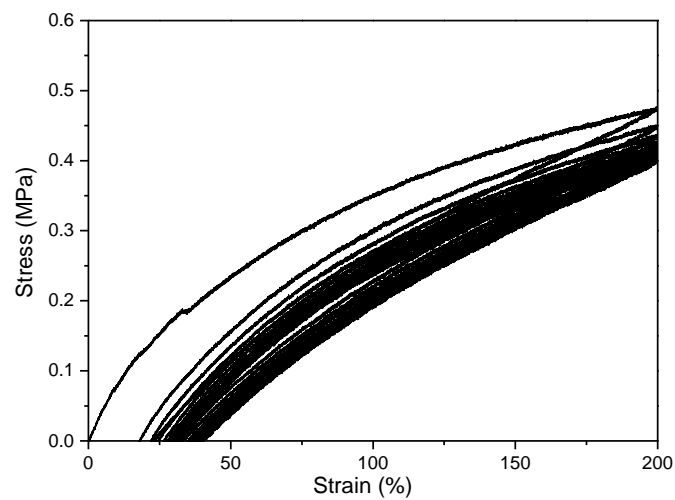

**Fig. S42** Cyclic tensile tests for TBPE-9 (10 cycles 200 % strain,  $10 \text{ mm min}^{-1}$ ).

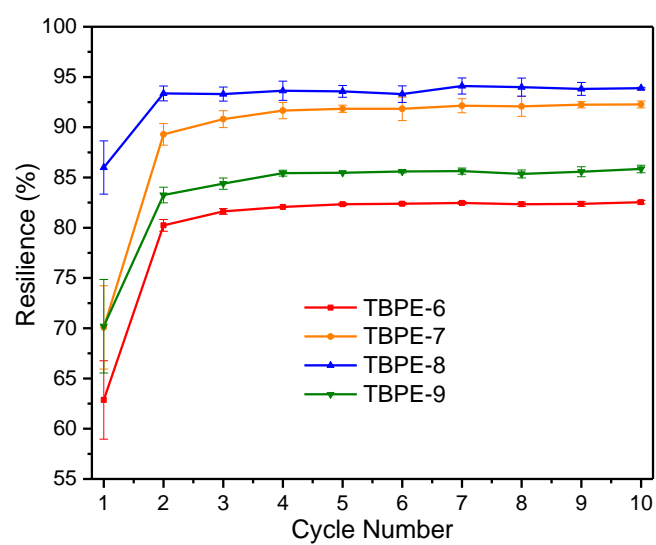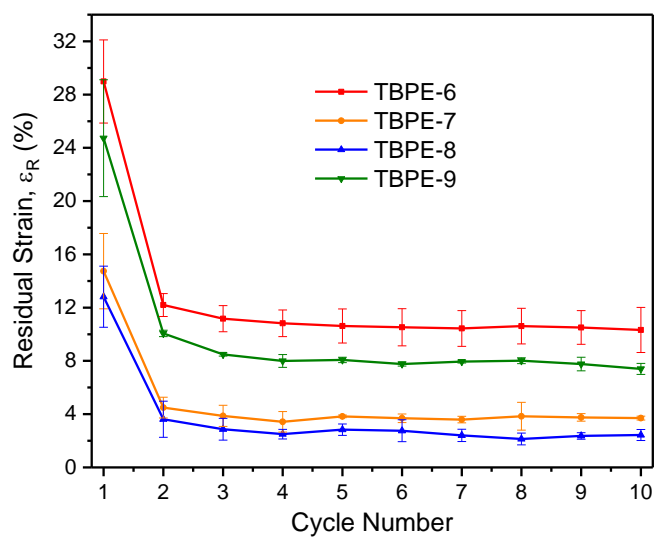

**Figure S43.** Cyclic tensile testing parameters as a function of cycle number for TBPEs-6 to -9; **Top:** Resilience and **Bottom:** Residual Strain. Samples were extended to a maximum of 200% strain at a rate of 10 mm min<sup>-1</sup>. Error bars represent a standard deviation of 3 specimens.

**Table S5.** Elastic recovery (ER), resilience and residual strain ( $\epsilon_R$ ) of three dumbbell specimens of each of TBPE-6 to 9 after 10 hysteresis cycles to a maximum strain of 200%. s.d.= standard deviation. N.B. first cycle omitted from calculated mean and s.d.

| Sample  | ER (%) $\pm$ s.d.                | Resilience (%) $\pm$ s.d.        | $\epsilon_R$ (%) $\pm$ s.d.      |
|---------|----------------------------------|----------------------------------|----------------------------------|
| TBPE-5  | 94.3 $\pm$ 0.2                   | 74.1 $\pm$ 2.1                   | 11.5 $\pm$ 0.3                   |
|         | 93.5 $\pm$ 0.2                   | 75.0 $\pm$ 2.0                   | 13.0 $\pm$ 0.5                   |
|         | 92.3 $\pm$ 0.3                   | 73.6 $\pm$ 2.1                   | 15.5 $\pm$ 0.7                   |
| Average | <b>93.3 <math>\pm</math> 0.9</b> | <b>74.2 <math>\pm</math> 2.1</b> | <b>13.3 <math>\pm</math> 1.7</b> |
| TBPE-6  | 94.1 $\pm$ 0.2                   | 81.9 $\pm$ 0.8                   | 11.8 $\pm$ 0.5                   |
|         | 94.4 $\pm$ 0.2                   | 82.1 $\pm$ 0.9                   | 11.2 $\pm$ 0.5                   |
|         | 95.3 $\pm$ 0.4                   | 82.2 $\pm$ 0.5                   | 9.4 $\pm$ 0.8                    |
| Average | <b>94.6 <math>\pm</math> 0.4</b> | <b>82.0 <math>\pm</math> 0.7</b> | <b>10.8 <math>\pm</math> 1.2</b> |
| TBPE-7  | 98.3 $\pm$ 0.3                   | 92.4 $\pm$ 0.5                   | 3.4 $\pm$ 0.6                    |
|         | 98.1 $\pm$ 0.2                   | 91.6 $\pm$ 1.1                   | 3.8 $\pm$ 0.4                    |
|         | 97.9 $\pm$ 0.3                   | 90.9 $\pm$ 1.2                   | 4.2 $\pm$ 0.6                    |
| Average | <b>98.1 <math>\pm</math> 0.3</b> | <b>91.6 <math>\pm</math> 1.1</b> | <b>3.8 <math>\pm</math> 0.6</b>  |
| TBPE-8  | 98.6 $\pm$ 0.3                   | 94.3 $\pm$ 0.5                   | 2.6 $\pm$ 0.7                    |
|         | 98.5 $\pm$ 0.4                   | 93.0 $\pm$ 0.5                   | 3.0 $\pm$ 0.8                    |
|         | 98.9 $\pm$ 0.2                   | 93.8 $\pm$ 0.5                   | 2.2 $\pm$ 0.4                    |
| Average | <b>98.7 <math>\pm</math> 0.3</b> | <b>93.7 <math>\pm</math> 0.7</b> | <b>2.7 <math>\pm</math> 0.7</b>  |
| TBPE-9  | 95.1 $\pm$ 0.4                   | 85.3 $\pm$ 0.7                   | 8.2 $\pm$ 0.7                    |
|         | 95.9 $\pm$ 0.4                   | 85.2 $\pm$ 0.8                   | 8.2 $\pm$ 0.8                    |
|         | 95.9 $\pm$ 0.4                   | 85.0 $\pm$ 0.4                   | 8.1 $\pm$ 0.9                    |
| Average | <b>95.9 <math>\pm</math> 0.4</b> | <b>85.2 <math>\pm</math> 0.9</b> | <b>8.2 <math>\pm</math> 0.8</b>  |

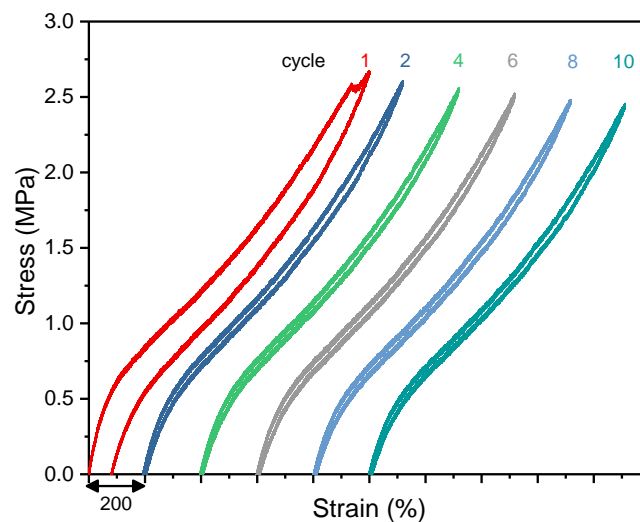

**Fig. S44** Cyclic tensile test TBPE-8 to 1000% strain. Only alternate cycles, horizontally shifted are shown for clarity.

### 13. Order-to-Disorder Transition

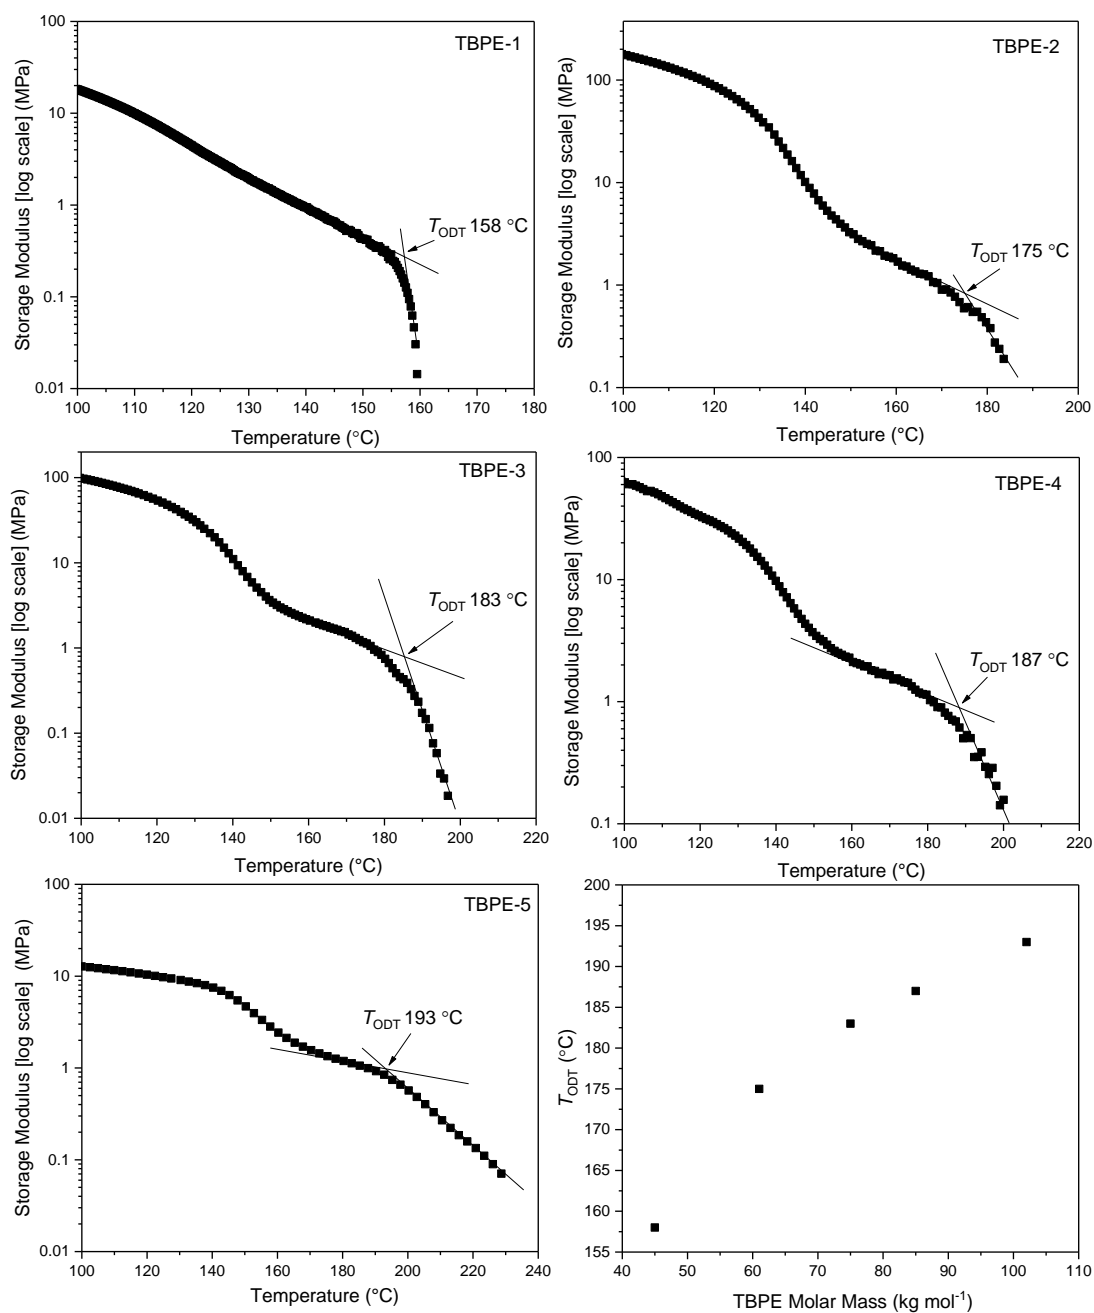

**Fig. S45** Determination of order-to-disorder transition from storage modulus ( $G'$ ) as a function of temperature. The transition temperatures ( $T_{ODT}$ ) were determined at the intersect of two extrapolated lines. Plot of measured  $T_{ODT}$  as a function of TBPE overall molar mass (determined by SEC-Table S1).

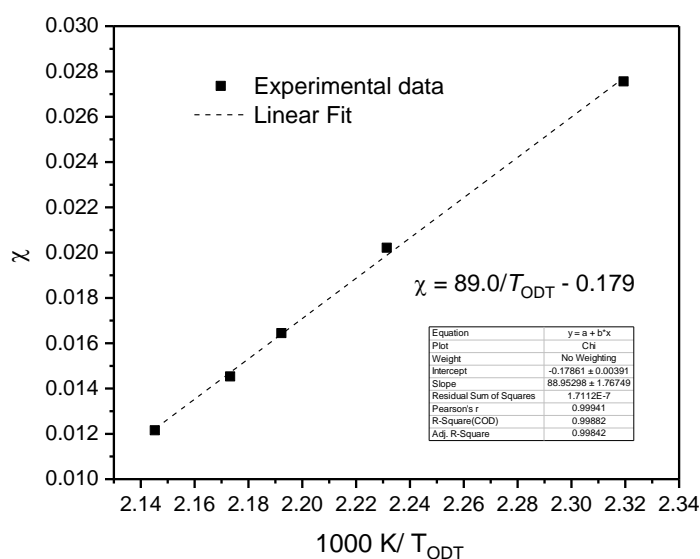

**Fig. S46** Temperature dependence of  $\chi$ . Order-to-disorder transition temperatures ( $T_{ODT}$ ) were determined for TBPE-1 to 5 by DMA.  $N_{Total}$  was calculated from the total molar mass estimated by SEC and based on room temperature densities of PDL ( $0.97 \text{ g cm}^{-3}$ ) and P(PA-*alt*-CHO) ( $1.04 \text{ g cm}^{-3}$ ) and  $118 \text{ \AA}$  standard reference volume.  $(\chi N)_{ODT}$  estimated based on phase diagram for monodisperse ABA triblock copolymers from Matsen.<sup>[12]</sup>

**Table S6.** Comparison of  $\chi$  with other literature values.

| Triblock Copolymer | $\chi$ (150 °C) | Ref.      |
|--------------------|-----------------|-----------|
| PE-PDL             | 0.035           | This work |
| PLA-PDL            | 0.091           | [6]       |
| PLA-PM             | 0.36            | [13]      |
| PS-PLA             | 0.075           | [14]      |
| PLA-P6MCL          | 0.045           | [15]      |
| PLA-P $\gamma$ MCL | 0.052           | [16]      |
| PLA-PCD77          | 0.038           | [17]      |
| PLA-PCL            | 0.038           | [17]      |
| PS-PI              | 0.049           | [18]      |

## 14. Thermal Gravimetric Analysis (TGA)

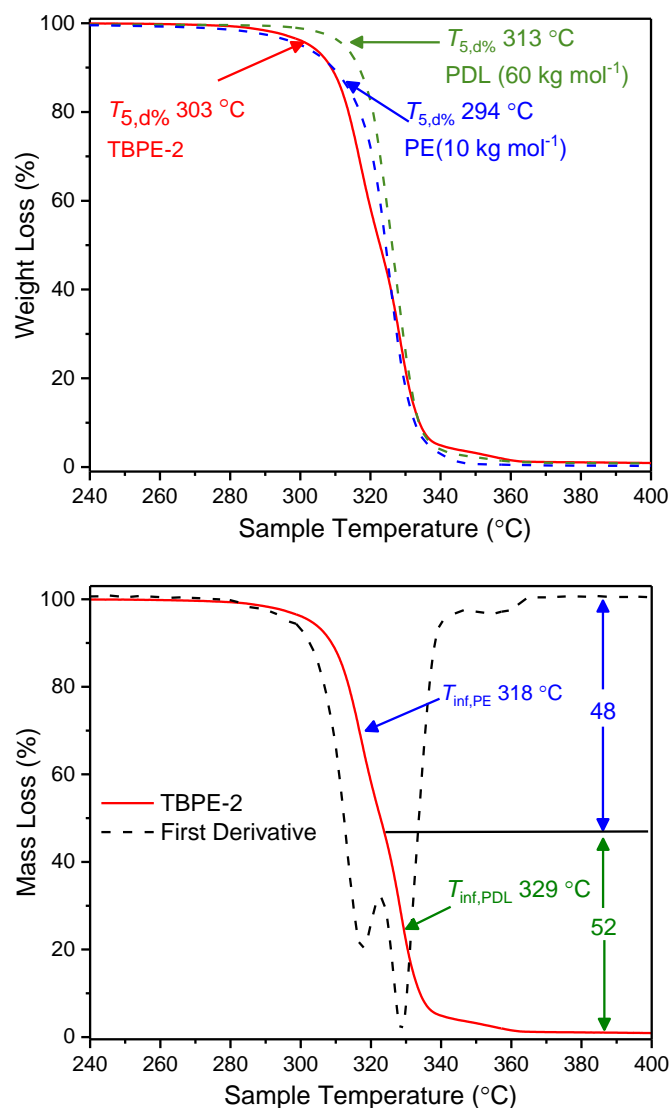

**Fig. S47** TGA analysis. **Top:** TGA curve for TBPE-2 (25-500 °C, 5 °C min<sup>-1</sup>, N<sub>2</sub> flow) compared to independent PDL and PE polymers. **Bottom:** TGA curve for TBPE-2 with first derivative showing two degradation steps assigned to the PE and PDL blocks.

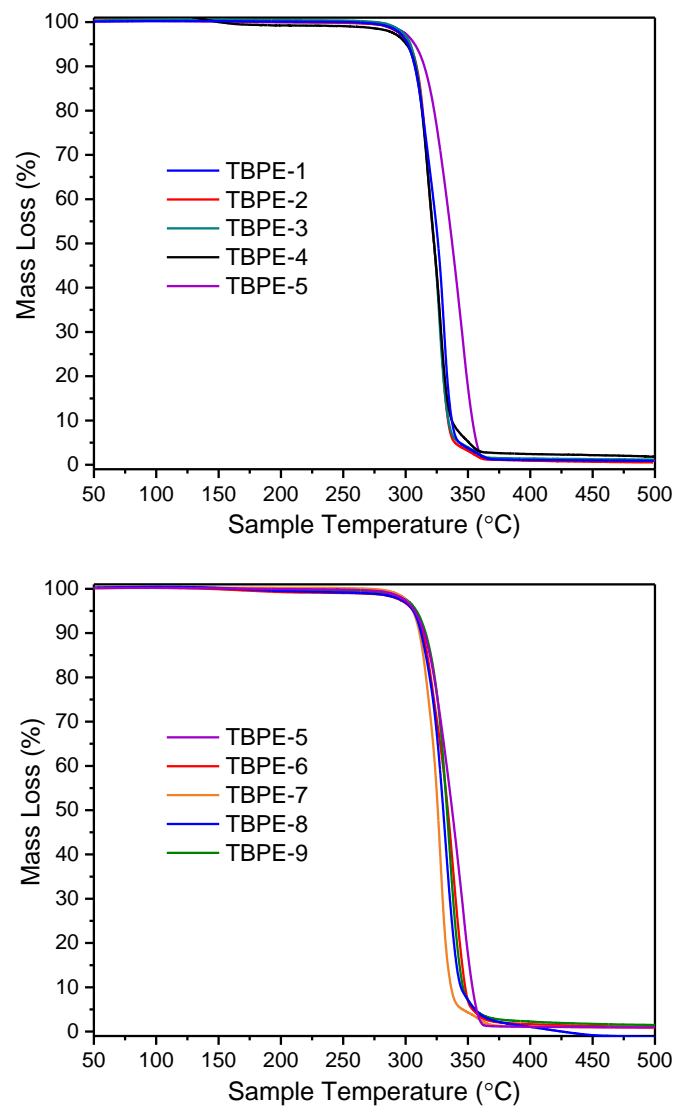

**Fig. S48** TGA curves for TBPE-1 to -9 (**Top:** TBPE-1 to -5; **Bottom:** TBPE-5 to -9). The degradation behaviour of TBPE-5 is more in agreement with that observed for TBPE-6 to -9 and is attributed to similar overall molar mass ( $M_n \sim 100 \text{ kg mol}^{-1}$ ), irrespective of block composition.

**Table S7.** TGA data for TBPE-1 to -9.<sup>a</sup>

| Sample                         | $T_{5\%,d}$ (°C) <sup>b</sup> | $T_{10\%,d}$ (°C) <sup>b</sup> | $T_{end}$ (°C) | Total Mass loss (%) | $T_{inf 1}$ (°C) [% mass loss] | $T_{inf 2}$ (°C) [% mass loss] |
|--------------------------------|-------------------------------|--------------------------------|----------------|---------------------|--------------------------------|--------------------------------|
| PE(10.2 kg mol <sup>-1</sup> ) | 294                           | 306                            | 336            | 98.0                | 323                            | n.a.                           |
| PDL(60 kg mol <sup>-1</sup> )  | 313                           | 317                            | 335            | 99.4                | 328                            | n.a                            |
| TBPE-1                         | 303                           | 308                            | 339            | 99.1                | 319 [35]                       | 331[60]                        |
| TBPE-2                         | 303                           | 309                            | 339            | 99.9                | 318 [48]                       | 329 [52]                       |
| TBPE-3                         | 304                           | 309                            | 338            | 98.8                | 317 [43]                       | 327 [56]                       |
| TBPE-4                         | 305                           | 309                            | 338            | 98.2                | 319 [48]                       | 328 [50]                       |
| TBPE-5                         | 307                           | 315                            | 355            | 99.3                | 331 [36]                       | 345 [64]                       |
| TBPE-6                         | 306                           | 314                            | 350            | 98.9                | 326 [31]                       | 338 [68]                       |
| TBPE-7                         | 307                           | 312                            | 367            | 99.2                | 319 [27]                       | 328 [72]                       |
| TBPE-8                         | 306                           | 312                            | 356            | 97.0                | 319 [19]                       | 332 [78]                       |
| TBPE-9                         | 309                           | 316                            | 355            | 98.5                | n.d.                           | n.d.                           |

<sup>a</sup> 30 – 500 °C, N<sub>2</sub> flow, 5 °C min<sup>-1</sup> heating rate; <sup>b</sup> Temperature at which 5% mass lost; <sup>c</sup> Temperature after which 10% mass lost; <sup>d</sup> Final temperature after no further degradation observed (near complete mass loss); <sup>e</sup> Total % mass loss; <sup>f</sup> Inflection for first degradation step based on first derivative of TGA curve and corresponding mass loss from integration; <sup>g</sup> Inflection point of second degradation step and corresponding mass loss.



## 15. Small Angle X-ray Scattering (SAXS)

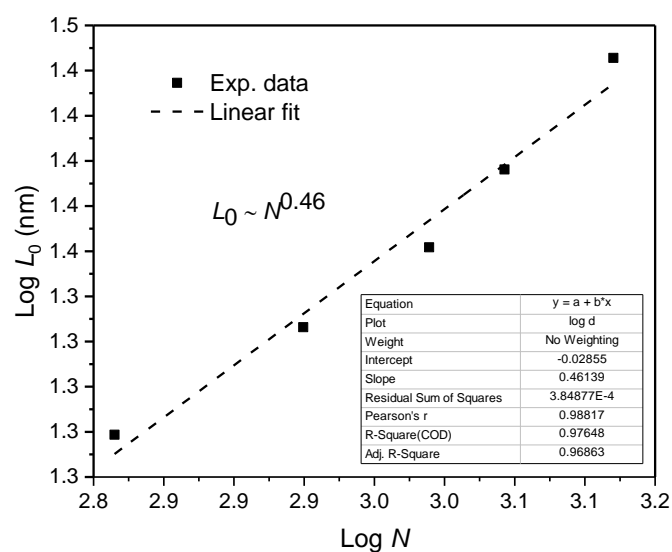

**Fig. S49.** Double logarithm plot of  $d$  versus  $N$  for TBPEs-1 to -5 of similar composition ( $f_{\text{hard}}$  0.4-0.44).  $d$  Values are calculated from  $d=2\pi/q^*$ , where  $q^*$  is principal scattering peak at room temperature prior to annealing. Domain size roughly scales with  $N$  as  $d \sim \chi^{1/6}N^\alpha$ . Here calculated  $\alpha \sim 0.5$  implies a weakly segregated system. This may be due to similar polarity of PDL and PE blocks.

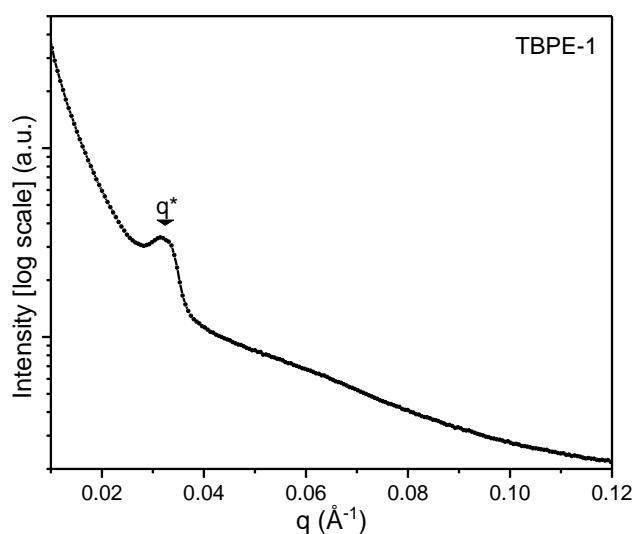

**Fig. S50** SAXS pattern for TBPE-1 at room temperature.

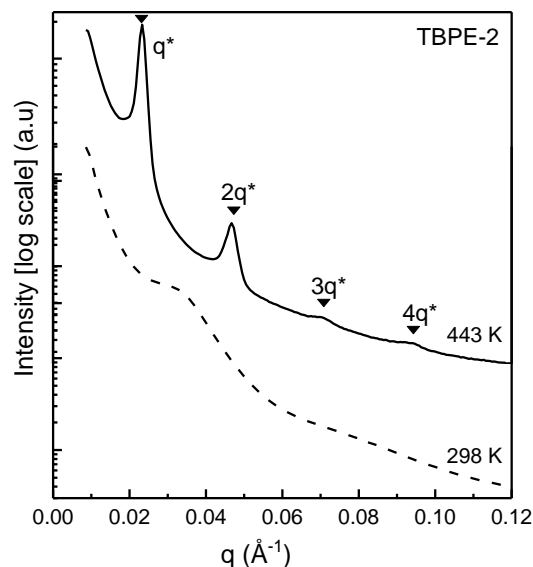

**Fig. S51** TBPE-2 on heating revealing higher order peaks observed consistent with a lamellar morphology:  $q^*$ ,  $2q^*$ ,  $3q^*$ ,  $4q^*$ .

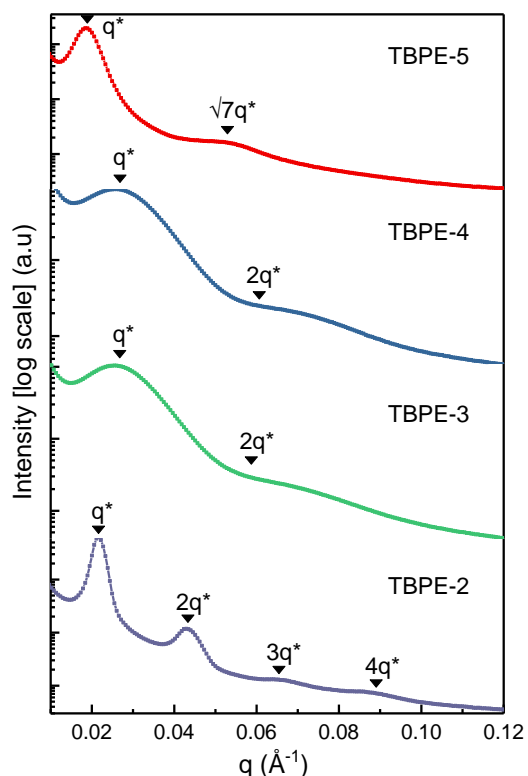

**Fig. S52** TBPE-2,-3,-4,-5 recorded at room temperature after annealing at 200 °C. On heating a precipitated sample of TBPE-2 at 10 °C min<sup>-1</sup>, higher order SAXS peaks were observed within a narrow temperature window (~175 °C) at  $q^*$ ,  $2q^*$ ,  $3q^*$  and  $4q^*$  consistent with a lamellar morphology. TBPE- 1 omitted for clarity ( $q^*$  at 0.03283  $\text{\AA}^{-1}$ ,  $d = 19$  nm); ( $\blacktriangledown$  represents principal scattering peaks). For TBPE- 5, annealing led to sharper principal scattering peak and domain spacing of 34 nm.

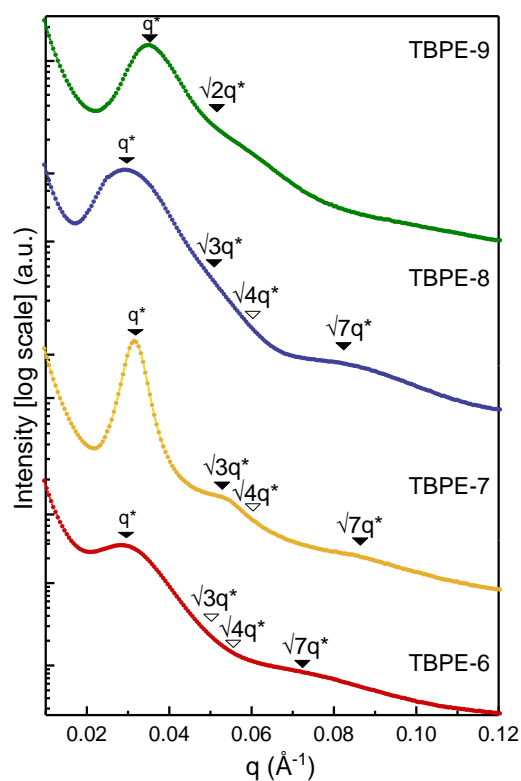

**Fig. S53** SAXS data of elastomer series TBPE-6 to -9, recorded at room temperature, of polymer films which were subjected to annealing at 200 °C. TBPE-6,-7 and-8 are assigned to hexagonal pack cylinders (HEX) and TBPE-9 to spherical morphology. Observed values for allowed SAXS reflections (based on the principal scattering peak,  $q^*$ ) are marked with  $\blacktriangledown$  and expected peaks not clearly observed/missing are identified with  $\nabla$ . Expected bragg maxima/allowed higher order SAXS reflections for microphase separated cylinders arranged on a hexagonal lattice:  $q^*$ ,  $\sqrt{3}q^*$ ,  $\sqrt{4}q^*$ ,  $\sqrt{7}q^*$ ,  $\sqrt{9}q^*$ , etc.; and spheres on a BCC lattice:  $q^*$ ,  $\sqrt{2}q^*$ ,  $\sqrt{4}q^*$ ,  $\sqrt{6}q^*$  etc.

## 16. Degradation Studies

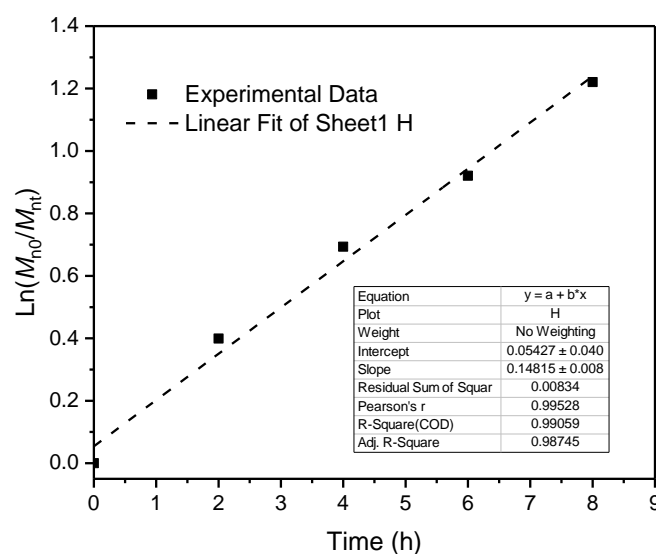

**Fig. S54** Determination of initial degradation rate constant for degradation of TBPE-5 (toluene, *p*-TSA, 60 °C) based on first order kinetic model:  $\text{Ln}(M_{nt}) = \text{Ln}(M_{n0}) - k_d t$ , where  $M_n$  is the number average molar mass, determined here by SEC (vs PS standards) and  $M_{n0}$ , the molar mass prior to the start of hydrolysis.  $k_d$  = degradation rate constant and  $t$  = degradation time.<sup>[19]</sup>

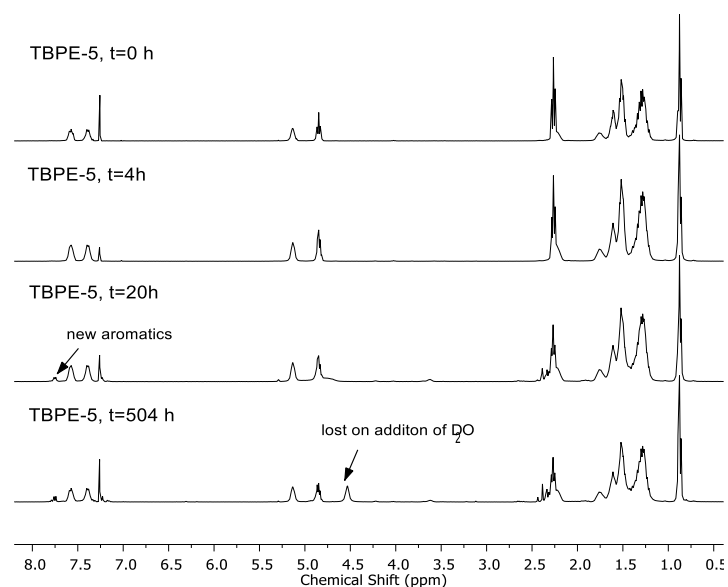

**Fig. S55** <sup>1</sup>H NMR spectroscopic analysis of TBPE-5 degradation (*p*-TSA, toluene, 60 °C). After 4 h, the reaction spectrum is remarkably similar to the starting polymer film ( $t = 0$  h) suggesting the formation of oligomers by chain scission reactions rather than hydrolysis to small molecules. After 20 h ( $M_n$  20.4 kg mol<sup>-1</sup>,  $\bar{D}$  1.54), additional aromatic environments are observed. After 3 weeks ( $M_n$  3.6 kg mol<sup>-1</sup>,  $\bar{D}$  2.19), the new resonance observed at 4.53 ppm is attributed to an -OH end-group and is lost on addition of D<sub>2</sub>O.

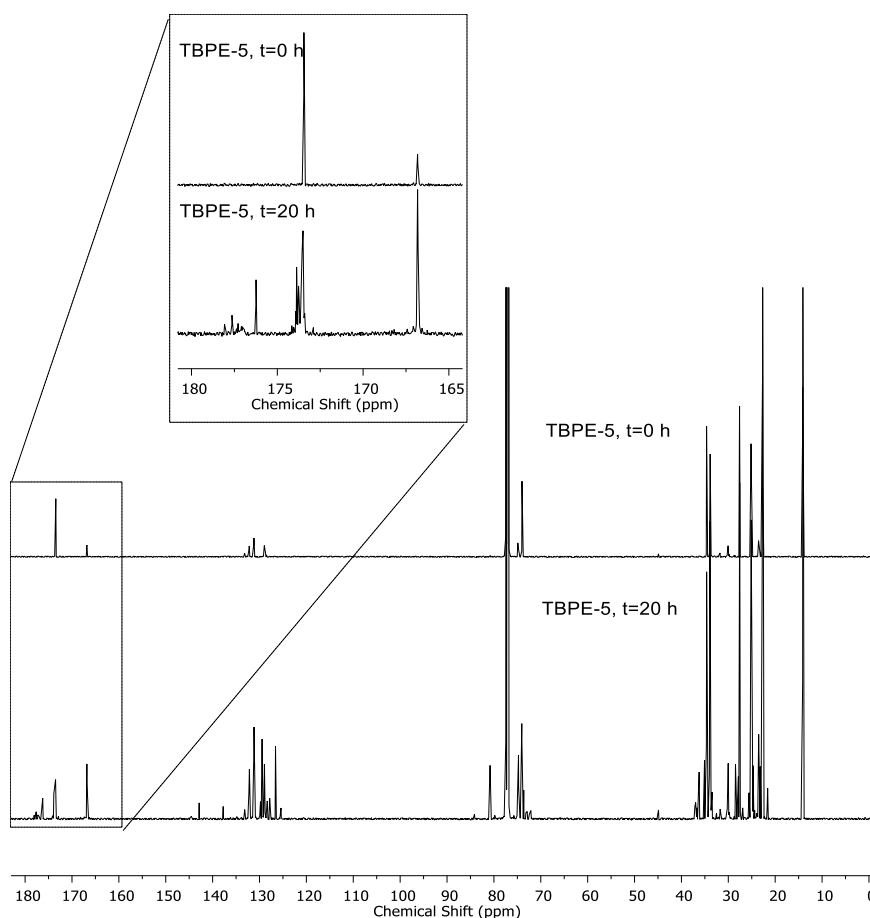

**Fig. S56.**  $^{13}\text{C}\{^1\text{H}\}$  NMR spectra ( $\text{CDCl}_3$ ) of TBPE-5 before degradation and after 20 h; inset carbonyl region showing evidence of formation of oligomers or transesterification.

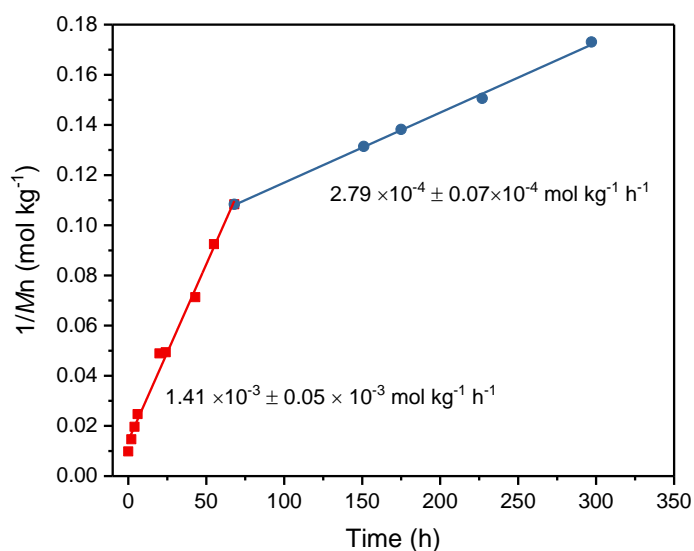

**Fig. S57** Plot of  $1/M_n$  versus time for degradation of TBPE-5 with  $p\text{-TSA}\cdot\text{H}_2\text{O}$  in toluene at  $60^\circ\text{C}$ .  $1/M_n$  is proportional to concentration of newly formed chains during polymer hydrolysis as described for example by Untereker and coworkers.<sup>[20]</sup>

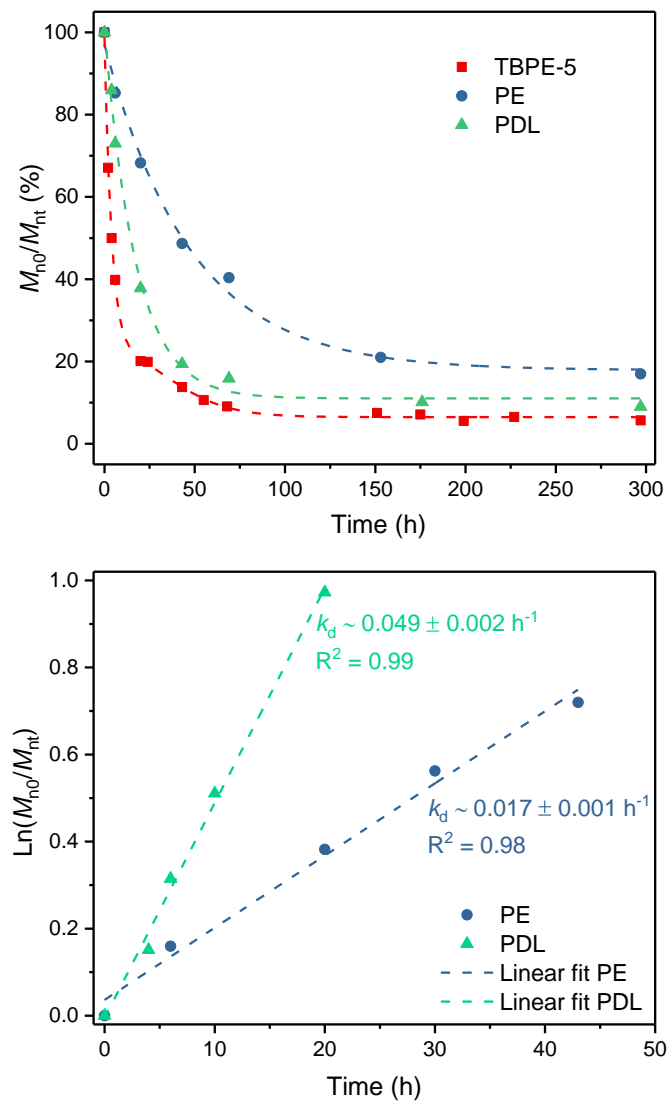

**Fig. S58** Polyester degradation with *p*-TSA.H<sub>2</sub>O in toluene at 60 °C. Comparison of TBPE-5 (102 kg mol<sup>-1</sup>), PE (19.1 kg mol<sup>-1</sup>) and PDL (60 kg mol<sup>-1</sup>).

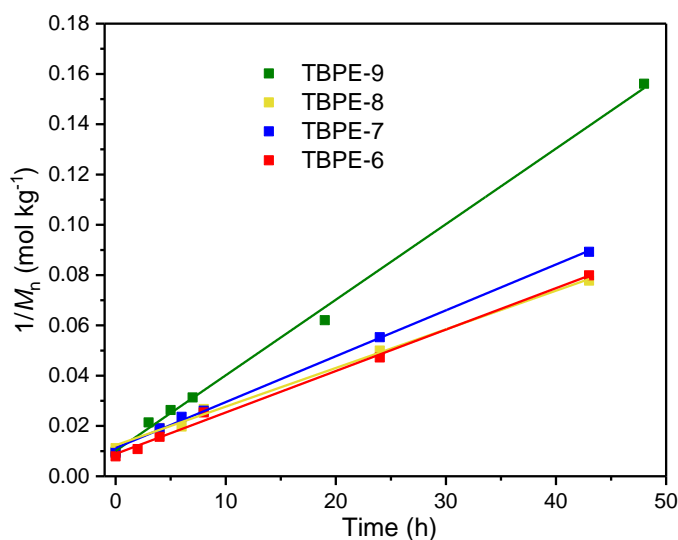

**Fig. S59** Degradation of TBPE-6 to-9 with *p*-TSA (6 mM) in toluene (2 wt%). Plots of  $1/M_n$  determined by SEC against time for aliquots taken at various time points.

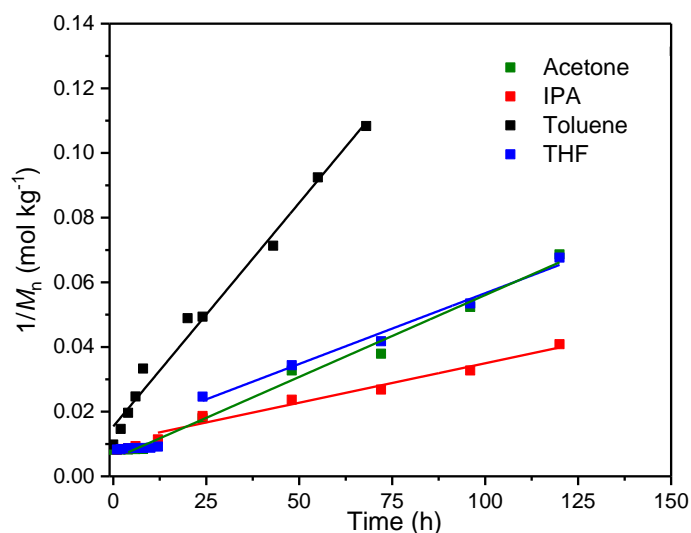

**Fig. S60** Degradation of TBPE-5 in different solvents with *p*-TSA.H<sub>2</sub>O at 60 °C.

**Table S8.** Static Water Contact Angles. Mean and standard deviation of 10 measurements for each sample.

| Sample ( $f_{\text{hard}}$ ) | Water Contact Angle/° | Standard Deviation/° |
|------------------------------|-----------------------|----------------------|
| TBPE-3 (0.40)                | 95.06                 | 1.04                 |
| TBPE-5 (0.40)                | 75.53                 | 2.38                 |
| TBPE-6 (0.29)                | 85.59                 | 1.98                 |
| TBPE-7 (0.24)                | 96.57                 | 1.77                 |
| TBPE-8 (0.19)                | 98.45                 | 0.90                 |
| TBPE-9 (0.12)                | 98.02                 | 1.65                 |

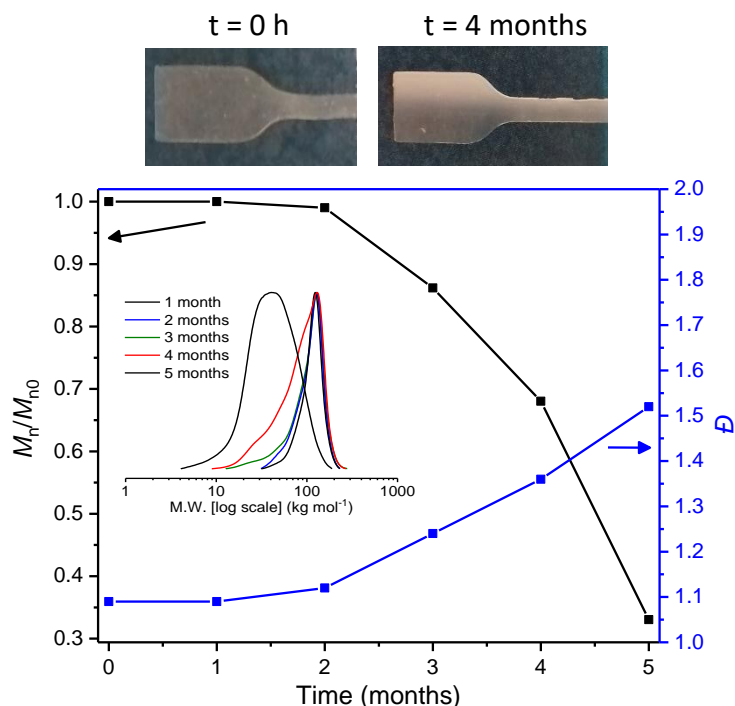

**Fig. S61** Degradation of TBPE-5 in water (~2 wt%) with *p*-TSA (6 mM) at 60 °C. Top: visual changes observed in the polymer during the degradation experiment. Bottom: Change in molar mass determined by SEC normalised to original at  $t = 0$  h ( $M_{n0}$ ) and dispersity ( $\bar{D}$ ); inset: SEC traces showing 67% molar mass loss from 102 to 34 kg mol<sup>-1</sup> after 5 months with concomitant increase in  $\bar{D}$  from 1.09 to 1.52.

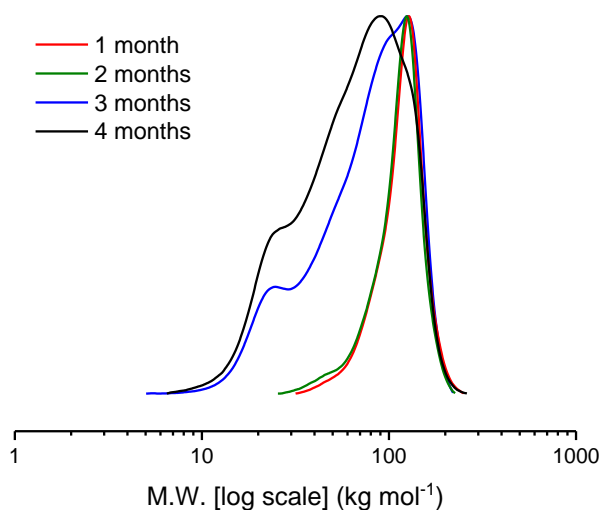

**Fig. S62** SEC traces of aliquots taken during enzymatic degradation of TBPE-5 with Novozym<sup>®</sup> 51032 in PBS solution (pH 7.4) at 37 °C.



## 17. Comparison to Literature TPEs.

Table S9. Comparison of TBPE-6 to -9 (Table 2) literature and commercial TPEs examples.

| Entry | Sample        | $M_n$ (kg mol <sup>-1</sup> ) | $f_{\text{hard}}$ | $E_y$ (MPa) | $\epsilon_b$ (%) | $\sigma_b$ (MPa) | Ref  |
|-------|---------------|-------------------------------|-------------------|-------------|------------------|------------------|------|
| 1     | MBPE-26       | 56.6                          | 0.27              | 1.7 ± 0.6   | 2450 ± 450       | 12 ± 3           | [5]  |
| 2     | LDL           | 136                           | 0.21              | 1.0 ± 0.1   | 1600 ± 200       | 4.5 ± 0.3        | [6]  |
| 3     | LDL           | 148                           | 0.27              | 1.1 ± 0.1   | 1310 ± 40        | 9.4 ± 0.7        | [6]  |
| 4     | PLLA-PDL-PLLA | 191                           | 0.24              | 2.9 ± 0.3   | 1212 ± 25        | 13.6 ± 0.5       | [9]  |
| 5     | PLLA-PDL-PLLA | 173                           | 0.13              | 2.0 ± 0.2   | 1420 ± 59        | 4.23 ± 0.2       | [9]  |
| 6     | PLLA-PDL-PLLA | 162                           | 0.063             | 1.1 ± 0.1   | 323 ± 10         | 0.14 ± 0.1       | [9]  |
| 4     | PLA-γMCL-PLA  | 94                            | 0.17              | 4.8 ± 0.2   | 1029 ± 20        | 24 ± 2           | [16] |
| 7     | LCD69L        | 104                           | 0.17              | 1.5 ± 0.3   | 2100 ± 100       | 9.9 ± 0.6        | [17] |

## 18. References

- [1] A. Spyros, D. S. Argyropoulos, R. H. Marchessault, *Macromolecules* **1997**, *30*, 327-329.
- [2] S. Kobayashi, H. Uyama, T. Takamoto, *Biomacromolecules* **2000**, *1*, 3-5.
- [3] J. Filik, A. W. Ashton, P. C. Y. Chang, P. A. Chater, S. J. Day, M. Drakopoulos, M. W. Gerring, M. L. Hart, O. V. Magdysyuk, S. Michalik, A. Smith, C. C. Tang, N. J. Terrill, M. T. Wharmby, H. Wilhelm, *J. Appl. Cryst.* **2017**, *50*, 959-966; B. R. Pauw, A. J. Smith, T. Snow, N. J. Terrill, A. F. Thunemann, *J. Appl. Cryst.* **2017**, *50*, 1800-1811.
- [4] G. S. Sulley, G. L. Gregory, T. T. D. Chen, L. P. Carrodeguas, G. Trott, A. Santmarti, K.-Y. Lee, N. J. Terrill, C. K. Williams, *Selective Catalysis Delivers Versatile Properties to CO<sub>2</sub>-Derived Block Polymers*, *J. Am. Chem. Soc.* **2019**, under review.
- [5] Y. Zhu, M. R. Radlauer, D. K. Schneiderman, M. S. P. Shaffer, M. A. Hillmyer, C. K. Williams, *Macromolecules* **2018**, *51*, 2466-2475.
- [6] M. T. Martello, D. K. Schneiderman, M. A. Hillmyer, *ACS Sustain. Chem. Eng.* **2014**, *2*, 2519-2526.
- [7] S. Cheng, M. Rabnawaz, F. Khan, B. Khan, *J. Appl. Polym. Sci.* **2019**, *136*, 47200; X. Yu, J. Jia, S. Xu, K. U. Lao, M. J. Sanford, R. K. Ramakrishnan, S. I. Nazarenko, T. R. Hoyer, G. W. Coates, R. A. DiStasio, *Nat. Commun.* **2018**, *9*, 2880; H. Li, H. Luo, J. Zhao, G. Zhang, *Macromolecules* **2018**, *51*, 2247-2257; K. Bester, A. Bukowska, B. Myśliwiec, K. Hus, D. Tomczyk, P. Urbaniak, W. Bukowski, *Polym. Chem.* **2018**, *9*, 2147-2156; G. Si, L. Zhang, B. Han, Z. Duan, B. Li, J. Dong, X. Li, B. Liu, *Polym. Chem.* **2015**, *6*, 6372-6377; P. K. Saini, C. Romain, Y. Zhu, C. K. Williams, *Polym. Chem.* **2014**, *5*, 6068-6075; L. Lin, J. Liang, Y. Xu, S. Wang, M. Xiao, L. Sun, Y. Meng, *Green Chem.* **2019**, *21*, 2469-2477; S. Cheng, B. Khan, F. Khan, M. Rabnawaz, *Polymers* **2018**, *10*.
- [8] A. X. H. Yong, G. D. Sims, S. J. P. Gnaniah, S. L. Ogin, P. A. Smith, *Advanced Manufacturing: Polymer & Composites Science* **2017**, *3*, 43-51.
- [9] S. Lee, K. Lee, Y.-W. Kim, J. Shin, *ACS Sustain. Chem. Eng.* **2015**, *3*, 2309-2320.
- [10] E. Guth, *J. Appl. Phys.* **1945**, *16*, 20-25.
- [11] Z. Wang, L. Yuan, F. Jiang, Y. Zhang, Z. Wang, C. Tang, *ACS Macro Lett.* **2016**, *5*, 220-223.
- [12] M. W. Matsen, *J. Chem. Phys.* **2000**, *113*, 5539-5544.
- [13] M. A. Hillmyer, W. B. Tolman, *Acc. Chem. Res.* **2014**, *47*, 2390-2396.
- [14] A. S. Zalusky, R. Olayo-Valles, J. H. Wolf, M. A. Hillmyer, *J. Am. Chem. Soc.* **2002**, *124*, 12761-12773.
- [15] M. T. Martello, M. A. Hillmyer, *Macromolecules* **2011**, *44*, 8537-8545.
- [16] A. Watts, N. Kurokawa, M. A. Hillmyer, *Biomacromolecules* **2017**, *18*, 1845-1854.
- [17] D. K. Schneiderman, E. M. Hill, M. T. Martello, M. A. Hillmyer, *Polym. Chem.* **2015**, *6*, 3641-3651.
- [18] C. C. Lin, S. V. Jonnalagadda, P. K. Kesani, H. J. Dai, N. P. Balsara, *Macromolecules* **1994**, *27*, 7769-7780.
- [19] V. Karmore, G. Madras, *Ind. Eng. Chem. Res.* **2001**, *40*, 1306-1311.
- [20] Lyu, J. Schley, B. Loy, D. Lind, C. Hobot, R. Sparer, D. Untereker, *Biomacromolecules* **2007**, *8*, 2301-2310.
